# Supplementary material
Source: publisher site journal article supplement (https://www.dovepress.com/article/supplementary_file/585872/585872%20Revised%20Supplementary%20Tables.xlsx)
Supplement: Supplementary file 1 [file 585872%20Revised%20Supplementary%20Tables.xlsx]

## Sheet: Supplementary Table S1 
	Supplementary Table S1.List of Clinical information
Sample_geo_accession	Sample_source_name_ch1	Sample_organism_ch1	Sample_characteristics_ch1	Sample_characteristics_ch1	Sample_characteristics_ch1	Sample_characteristics_ch1	Sample_characteristics_ch1	Sample_characteristics_ch1
GSM3079737	whole blood_MIM	Homo sapiens	Sex: m	diagnosis: MIM	site_onset: NA	age_onset: NA	survival_yr: NA	censored: NA
GSM3079740	whole blood_ALS	Homo sapiens	Sex: m	diagnosis: ALS	site_onset: s	age_onset: 59.27	survival_yr: 4.89427104722792	censored: 1
GSM3079742	whole blood_ALS	Homo sapiens	Sex: v	diagnosis: ALS	site_onset: s	age_onset: 69.84	survival_yr: 1.47279945242984	censored: 0
GSM3079744	whole blood_CON	Homo sapiens	Sex: v	diagnosis: CON	site_onset: NA	age_onset: NA	survival_yr: NA	censored: NA
GSM3079746	whole blood_MIM	Homo sapiens	Sex: m	diagnosis: MIM	site_onset: NA	age_onset: NA	survival_yr: NA	censored: 0
GSM3079749	whole blood_ALS	Homo sapiens	Sex: m	diagnosis: ALS	site_onset: s	age_onset: 45.62	survival_yr: 4.41696098562629	censored: 0
GSM3079751	whole blood_ALS	Homo sapiens	Sex: m	diagnosis: ALS	site_onset: s	age_onset: 70.73	survival_yr: 3.73680355920602	censored: 1
GSM3079753	whole blood_MIM	Homo sapiens	Sex: m	diagnosis: MIM	site_onset: NA	age_onset: NA	survival_yr: NA	censored: NA
GSM3079756	whole blood_ALS	Homo sapiens	Sex: m	diagnosis: ALS	site_onset: s	age_onset: 58.46	survival_yr: 1.88223134839151	censored: 0
GSM3079758	whole blood_ALS	Homo sapiens	Sex: m	diagnosis: ALS	site_onset: b	age_onset: 53.21	survival_yr: 2.209575633128	censored: 0
GSM3079760	whole blood_CON	Homo sapiens	Sex: v	diagnosis: CON	site_onset: NA	age_onset: NA	survival_yr: NA	censored: NA
GSM3079762	whole blood_MIM	Homo sapiens	Sex: m	diagnosis: MIM	site_onset: NA	age_onset: NA	survival_yr: NA	censored: NA
GSM3079763	whole blood_ALS	Homo sapiens	Sex: m	diagnosis: ALS	site_onset: b	age_onset: 68.8	survival_yr: 2.95633127994525	censored: 0
GSM3079765	whole blood_ALS	Homo sapiens	Sex: m	diagnosis: ALS	site_onset: s	age_onset: 43.74	survival_yr: 3.88765229295003	censored: 0
GSM3079768	whole blood_MIM	Homo sapiens	Sex: m	diagnosis: MIM	site_onset: NA	age_onset: NA	survival_yr: NA	censored: NA
GSM3079770	whole blood_ALS	Homo sapiens	Sex: v	diagnosis: ALS	site_onset: b	age_onset: 63.94	survival_yr: 1.6890212183436	censored: 0
GSM3079772	whole blood_ALS	Homo sapiens	Sex: m	diagnosis: ALS	site_onset: s	age_onset: 35.21	survival_yr: 2.92826146475017	censored: 1
GSM3079774	whole blood_MIM	Homo sapiens	Sex: v	diagnosis: MIM	site_onset: NA	age_onset: NA	survival_yr: NA	censored: NA
GSM3079776	whole blood_ALS	Homo sapiens	Sex: v	diagnosis: ALS	site_onset: b	age_onset: 67.14	survival_yr: 2.77923340177961	censored: 0
GSM3079779	whole blood_ALS	Homo sapiens	Sex: m	diagnosis: ALS	site_onset: s	age_onset: 70.97	survival_yr: 2.96018480492813	censored: 0
GSM3079781	whole blood_MIM	Homo sapiens	Sex: m	diagnosis: MIM	site_onset: NA	age_onset: NA	survival_yr: NA	censored: NA
GSM3079783	whole blood_ALS	Homo sapiens	Sex: v	diagnosis: ALS	site_onset: s	age_onset: 65.49	survival_yr: 2.86318275154005	censored: 0
GSM3079785	whole blood_ALS	Homo sapiens	Sex: v	diagnosis: ALS	site_onset: s	age_onset: 60.92	survival_yr: 6.14365503080082	censored: 0
GSM3079787	whole blood_CON	Homo sapiens	Sex: v	diagnosis: CON	site_onset: NA	age_onset: NA	survival_yr: NA	censored: NA
GSM3079789	whole blood_ALS	Homo sapiens	Sex: v	diagnosis: ALS	site_onset: s	age_onset: 64.58	survival_yr: 2.69446954141	censored: 0
GSM3079792	whole blood_MIM	Homo sapiens	Sex: m	diagnosis: MIM	site_onset: NA	age_onset: NA	survival_yr: NA	censored: NA
GSM3079794	whole blood_ALS	Homo sapiens	Sex: m	diagnosis: ALS	site_onset: b	age_onset: 71.9	survival_yr: 1.84127310061601	censored: 0
GSM3079796	whole blood_CON	Homo sapiens	Sex: v	diagnosis: CON	site_onset: NA	age_onset: NA	survival_yr: NA	censored: NA
GSM3079799	whole blood_MIM	Homo sapiens	Sex: v	diagnosis: MIM	site_onset: NA	age_onset: NA	survival_yr: NA	censored: NA
GSM3079801	whole blood_ALS	Homo sapiens	Sex: v	diagnosis: ALS	site_onset: b	age_onset: 55.41	survival_yr: 2.08486652977413	censored: 0
GSM3079803	whole blood_ALS	Homo sapiens	Sex: v	diagnosis: ALS	site_onset: s	age_onset: 50.53	survival_yr: 3.88478439425051	censored: 1
GSM3079805	whole blood_MIM	Homo sapiens	Sex: m	diagnosis: MIM	site_onset: NA	age_onset: NA	survival_yr: NA	censored: NA
GSM3079807	whole blood_ALS	Homo sapiens	Sex: m	diagnosis: ALS	site_onset: s	age_onset: 44.49	survival_yr: 5.20199178644764	censored: 1
GSM3079812	whole blood_ALS	Homo sapiens	Sex: v	diagnosis: ALS	site_onset: b	age_onset: 46.55	survival_yr: 0.691615331964414	censored: 0
GSM3079819	whole blood_CON	Homo sapiens	Sex: v	diagnosis: CON	site_onset: NA	age_onset: NA	survival_yr: NA	censored: NA
GSM3079821	whole blood_MIM	Homo sapiens	Sex: m	diagnosis: MIM	site_onset: NA	age_onset: NA	survival_yr: NA	censored: NA
GSM3079823	whole blood_ALS	Homo sapiens	Sex: v	diagnosis: ALS	site_onset: s	age_onset: 57.23	survival_yr: 0.661854893908284	censored: 0
GSM3079824	whole blood_ALS	Homo sapiens	Sex: m	diagnosis: ALS	site_onset: b	age_onset: 70.42	survival_yr: 1.82640657084188	censored: 0
GSM3079826	whole blood_MIM	Homo sapiens	Sex: m	diagnosis: MIM	site_onset: NA	age_onset: NA	survival_yr: NA	censored: NA
GSM3079827	whole blood_ALS	Homo sapiens	Sex: v	diagnosis: ALS	site_onset: b	age_onset: 74.61	survival_yr: 0.930041067761806	censored: 0
GSM3079829	whole blood_ALS	Homo sapiens	Sex: m	diagnosis: ALS	site_onset: s	age_onset: 71.75	survival_yr: 7.5326830937714	censored: 1
GSM3079831	whole blood_CON	Homo sapiens	Sex: v	diagnosis: CON	site_onset: NA	age_onset: NA	survival_yr: NA	censored: NA
GSM3079832	whole blood_ALS	Homo sapiens	Sex: v	diagnosis: ALS	site_onset: b	age_onset: 62.32	survival_yr: 3.36104038329911	censored: 0
GSM3079834	whole blood_ALS	Homo sapiens	Sex: m	diagnosis: ALS	site_onset: s	age_onset: 59.59	survival_yr: 2.4141067761807	censored: 0
GSM3079835	whole blood_MIM	Homo sapiens	Sex: m	diagnosis: MIM	site_onset: NA	age_onset: NA	survival_yr: NA	censored: NA
GSM3079837	whole blood_ALS	Homo sapiens	Sex: v	diagnosis: ALS	site_onset: s	age_onset: 55.23	survival_yr: 3.33536618754278	censored: 0
GSM3079838	whole blood_ALS	Homo sapiens	Sex: v	diagnosis: ALS	site_onset: b	age_onset: 70.98	survival_yr: 1.30747433264887	censored: 0
GSM3079840	whole blood_CON	Homo sapiens	Sex: m	diagnosis: CON	site_onset: NA	age_onset: NA	survival_yr: NA	censored: NA
GSM3079841	whole blood_ALS	Homo sapiens	Sex: m	diagnosis: ALS	site_onset: b	age_onset: 83.93	survival_yr: 1.26096509240246	censored: 0
GSM3079843	whole blood_ALS	Homo sapiens	Sex: v	diagnosis: ALS	site_onset: b	age_onset: 55.47	survival_yr: 1.39516084873375	censored: 0
GSM3079845	whole blood_MIM	Homo sapiens	Sex: v	diagnosis: MIM	site_onset: NA	age_onset: NA	survival_yr: NA	censored: NA
GSM3079849	whole blood_ALS	Homo sapiens	Sex: v	diagnosis: ALS	site_onset: b	age_onset: 71.56	survival_yr: 1.38182067077344	censored: 0
GSM3079851	whole blood_ALS	Homo sapiens	Sex: m	diagnosis: ALS	site_onset: s	age_onset: 63.38	survival_yr: 1.47420944558521	censored: 0
GSM3079853	whole blood_CON	Homo sapiens	Sex: m	diagnosis: CON	site_onset: NA	age_onset: NA	survival_yr: NA	censored: NA
GSM3079855	whole blood_MIM	Homo sapiens	Sex: m	diagnosis: MIM	site_onset: NA	age_onset: NA	survival_yr: NA	censored: 1
GSM3079857	whole blood_ALS	Homo sapiens	Sex: m	diagnosis: ALS	site_onset: s	age_onset: 72.6	survival_yr: 3.90376454483231	censored: 0
GSM3079859	whole blood_ALS	Homo sapiens	Sex: m	diagnosis: ALS	site_onset: b	age_onset: 82.19	survival_yr: 1.34456536618754	censored: 0
GSM3079861	whole blood_MIM	Homo sapiens	Sex: m	diagnosis: MIM	site_onset: NA	age_onset: NA	survival_yr: NA	censored: NA
GSM3079863	whole blood_ALS	Homo sapiens	Sex: m	diagnosis: ALS	site_onset: s	age_onset: 64.23	survival_yr: 1.04857631759069	censored: 0
GSM3079864	whole blood_ALS	Homo sapiens	Sex: v	diagnosis: ALS	site_onset: s	age_onset: 86.44	survival_yr: 3.00558521560575	censored: 1
GSM3079865	whole blood_CON	Homo sapiens	Sex: m	diagnosis: CON	site_onset: NA	age_onset: NA	survival_yr: NA	censored: NA
GSM3079866	whole blood_MIM	Homo sapiens	Sex: m	diagnosis: MIM	site_onset: NA	age_onset: NA	survival_yr: NA	censored: NA
GSM3079867	whole blood_ALS	Homo sapiens	Sex: m	diagnosis: ALS	site_onset: s	age_onset: 41.72	survival_yr: 2.19786447638604	censored: 0
GSM3079868	whole blood_ALS	Homo sapiens	Sex: v	diagnosis: ALS	site_onset: s	age_onset: 72.79	survival_yr: 1.26886379192334	censored: 0
GSM3079869	whole blood_MIM	Homo sapiens	Sex: m	diagnosis: MIM	site_onset: NA	age_onset: NA	survival_yr: NA	censored: NA
GSM3079870	whole blood_ALS	Homo sapiens	Sex: m	diagnosis: ALS	site_onset: b	age_onset: 69.51	survival_yr: 5.83565366187543	censored: 0
GSM3079871	whole blood_ALS	Homo sapiens	Sex: m	diagnosis: ALS	site_onset: s	age_onset: 33.1	survival_yr: 3.00677618069815	censored: 1
GSM3079872	whole blood_CON	Homo sapiens	Sex: m	diagnosis: CON	site_onset: NA	age_onset: NA	survival_yr: NA	censored: NA
GSM3079873	whole blood_CON	Homo sapiens	Sex: m	diagnosis: CON	site_onset: NA	age_onset: NA	survival_yr: NA	censored: NA
GSM3079874	whole blood_MIM	Homo sapiens	Sex: m	diagnosis: MIM	site_onset: NA	age_onset: NA	survival_yr: NA	censored: NA
GSM3079875	whole blood_ALS	Homo sapiens	Sex: v	diagnosis: ALS	site_onset: s	age_onset: 42.94	survival_yr: 4.09080082135524	censored: 0
GSM3079876	whole blood_ALS	Homo sapiens	Sex: v	diagnosis: ALS	site_onset: s	age_onset: 54.73	survival_yr: 1.69710472279261	censored: 0
GSM3079877	whole blood_ALS	Homo sapiens	Sex: v	diagnosis: ALS	site_onset: s	age_onset: 77.56	survival_yr: 1.42425735797399	censored: 0
GSM3079878	whole blood_CON	Homo sapiens	Sex: m	diagnosis: CON	site_onset: NA	age_onset: NA	survival_yr: NA	censored: NA
GSM3079879	whole blood_CON	Homo sapiens	Sex: m	diagnosis: CON	site_onset: NA	age_onset: NA	survival_yr: NA	censored: NA
GSM3079880	whole blood_CON	Homo sapiens	Sex: m	diagnosis: CON	site_onset: NA	age_onset: NA	survival_yr: NA	censored: NA
GSM3079881	whole blood_ALS	Homo sapiens	Sex: m	diagnosis: ALS	site_onset: s	age_onset: 26.04	survival_yr: 3.15917864476386	censored: 1
GSM3079882	whole blood_CON	Homo sapiens	Sex: m	diagnosis: CON	site_onset: NA	age_onset: NA	survival_yr: NA	censored: NA
GSM3079883	whole blood_CON	Homo sapiens	Sex: v	diagnosis: CON	site_onset: NA	age_onset: NA	survival_yr: NA	censored: NA
GSM3079884	whole blood_MIM	Homo sapiens	Sex: m	diagnosis: MIM	site_onset: s	age_onset: 34.38	survival_yr: 29.7404654346338	censored: 1
GSM3079885	whole blood_ALS	Homo sapiens	Sex: m	diagnosis: ALS	site_onset: b	age_onset: 72.41	survival_yr: 1.25461327857631	censored: 0
GSM3079886	whole blood_CON	Homo sapiens	Sex: v	diagnosis: CON	site_onset: NA	age_onset: NA	survival_yr: NA	censored: NA
GSM3079887	whole blood_MIM	Homo sapiens	Sex: m	diagnosis: MIM	site_onset: NA	age_onset: NA	survival_yr: NA	censored: NA
GSM3079888	whole blood_CON	Homo sapiens	Sex: v	diagnosis: CON	site_onset: NA	age_onset: NA	survival_yr: NA	censored: NA
GSM3079889	whole blood_MIM	Homo sapiens	Sex: m	diagnosis: MIM	site_onset: NA	age_onset: NA	survival_yr: NA	censored: NA
GSM3079890	whole blood_ALS	Homo sapiens	Sex: m	diagnosis: ALS	site_onset: s	age_onset: 79.57	survival_yr: 2.12472963723478	censored: 0
GSM3079891	whole blood_ALS	Homo sapiens	Sex: m	diagnosis: ALS	site_onset: s	age_onset: 48.97	survival_yr: 2.35922655715264	censored: 0
GSM3079892	whole blood_CON	Homo sapiens	Sex: m	diagnosis: CON	site_onset: NA	age_onset: NA	survival_yr: NA	censored: NA
GSM3079893	whole blood_MIM	Homo sapiens	Sex: v	diagnosis: MIM	site_onset: NA	age_onset: NA	survival_yr: NA	censored: NA
GSM3079894	whole blood_CON	Homo sapiens	Sex: m	diagnosis: CON	site_onset: NA	age_onset: NA	survival_yr: NA	censored: NA
GSM3079895	whole blood_MIM	Homo sapiens	Sex: m	diagnosis: MIM	site_onset: NA	age_onset: NA	survival_yr: NA	censored: NA
GSM3079896	whole blood_ALS	Homo sapiens	Sex: v	diagnosis: ALS	site_onset: s	age_onset: 47.57	survival_yr: 13.5826351813826	censored: 0
GSM3079897	whole blood_ALS	Homo sapiens	Sex: m	diagnosis: ALS	site_onset: s	age_onset: 76.35	survival_yr: 1.8156399726215	censored: 0
GSM3079898	whole blood_CON	Homo sapiens	Sex: m	diagnosis: CON	site_onset: NA	age_onset: NA	survival_yr: NA	censored: NA
GSM3079899	whole blood_MIM	Homo sapiens	Sex: v	diagnosis: MIM	site_onset: NA	age_onset: NA	survival_yr: NA	censored: NA
GSM3079900	whole blood_CON	Homo sapiens	Sex: v	diagnosis: CON	site_onset: NA	age_onset: NA	survival_yr: NA	censored: NA
GSM3079901	whole blood_MIM	Homo sapiens	Sex: v	diagnosis: MIM	site_onset: NA	age_onset: NA	survival_yr: NA	censored: NA
GSM3079902	whole blood_ALS	Homo sapiens	Sex: m	diagnosis: ALS	site_onset: s	age_onset: 42.54	survival_yr: 3.0890212183436	censored: 1
GSM3079903	whole blood_CON	Homo sapiens	Sex: v	diagnosis: CON	site_onset: NA	age_onset: NA	survival_yr: NA	censored: NA
GSM3079904	whole blood_MIM	Homo sapiens	Sex: v	diagnosis: MIM	site_onset: s	age_onset: 50.12	survival_yr: 2.99156741957564	censored: 1
GSM3079905	whole blood_CON	Homo sapiens	Sex: v	diagnosis: CON	site_onset: NA	age_onset: NA	survival_yr: NA	censored: NA
GSM3079906	whole blood_MIM	Homo sapiens	Sex: m	diagnosis: MIM	site_onset: NA	age_onset: NA	survival_yr: NA	censored: NA
GSM3079907	whole blood_ALS	Homo sapiens	Sex: m	diagnosis: ALS	site_onset: s	age_onset: 58.55	survival_yr: 4.37128678986996	censored: 1
GSM3079908	whole blood_ALS	Homo sapiens	Sex: m	diagnosis: ALS	site_onset: s	age_onset: 61.19	survival_yr: 3.41780287474333	censored: 1
GSM3079909	whole blood_CON	Homo sapiens	Sex: m	diagnosis: CON	site_onset: NA	age_onset: NA	survival_yr: NA	censored: NA
GSM3079910	whole blood_MIM	Homo sapiens	Sex: m	diagnosis: MIM	site_onset: NA	age_onset: NA	survival_yr: NA	censored: NA
GSM3079911	whole blood_CON	Homo sapiens	Sex: v	diagnosis: CON	site_onset: NA	age_onset: NA	survival_yr: NA	censored: NA
GSM3079912	whole blood_MIM	Homo sapiens	Sex: m	diagnosis: MIM	site_onset: NA	age_onset: NA	survival_yr: NA	censored: NA
GSM3079913	whole blood_ALS	Homo sapiens	Sex: m	diagnosis: ALS	site_onset: s	age_onset: 82.42	survival_yr: 2.00436687200548	censored: 0
GSM3079914	whole blood_ALS	Homo sapiens	Sex: v	diagnosis: ALS	site_onset: b	age_onset: 81.54	survival_yr: 0.502436687200543	censored: 0
GSM3079915	whole blood_CON	Homo sapiens	Sex: v	diagnosis: CON	site_onset: NA	age_onset: NA	survival_yr: NA	censored: NA
GSM3079916	whole blood_MIM	Homo sapiens	Sex: v	diagnosis: MIM	site_onset: NA	age_onset: NA	survival_yr: NA	censored: NA
GSM3079917	whole blood_CON	Homo sapiens	Sex: v	diagnosis: CON	site_onset: NA	age_onset: NA	survival_yr: NA	censored: NA
GSM3079918	whole blood_MIM	Homo sapiens	Sex: m	diagnosis: MIM	site_onset: NA	age_onset: NA	survival_yr: NA	censored: NA
GSM3079919	whole blood_ALS	Homo sapiens	Sex: m	diagnosis: ALS	site_onset: s	age_onset: 39.59	survival_yr: 4.34155373032169	censored: 1
GSM3079920	whole blood_ALS	Homo sapiens	Sex: v	diagnosis: ALS	site_onset: s	age_onset: 68.75	survival_yr: 0.402635181382621	censored: 0
GSM3079921	whole blood_CON	Homo sapiens	Sex: v	diagnosis: CON	site_onset: NA	age_onset: NA	survival_yr: NA	censored: NA
GSM3079922	whole blood_MIM	Homo sapiens	Sex: m	diagnosis: MIM	site_onset: NA	age_onset: NA	survival_yr: NA	censored: NA
GSM3079923	whole blood_CON	Homo sapiens	Sex: m	diagnosis: CON	site_onset: NA	age_onset: NA	survival_yr: NA	censored: NA
GSM3079924	whole blood_MIM	Homo sapiens	Sex: m	diagnosis: MIM	site_onset: NA	age_onset: NA	survival_yr: NA	censored: NA
GSM3079925	whole blood_ALS	Homo sapiens	Sex: m	diagnosis: ALS	site_onset: s	age_onset: 48.18	survival_yr: 4.00069815195072	censored: 1
GSM3079926	whole blood_ALS	Homo sapiens	Sex: v	diagnosis: ALS	site_onset: b	age_onset: 58.24	survival_yr: 11.0905954825462	censored: 0
GSM3079927	whole blood_CON	Homo sapiens	Sex: m	diagnosis: CON	site_onset: NA	age_onset: NA	survival_yr: NA	censored: NA
GSM3079928	whole blood_MIM	Homo sapiens	Sex: v	diagnosis: MIM	site_onset: NA	age_onset: NA	survival_yr: NA	censored: NA
GSM3079929	whole blood_CON	Homo sapiens	Sex: m	diagnosis: CON	site_onset: NA	age_onset: NA	survival_yr: NA	censored: NA
GSM3079930	whole blood_ALS	Homo sapiens	Sex: m	diagnosis: ALS	site_onset: s	age_onset: 60.92	survival_yr: 3.34557152635182	censored: 0
GSM3079931	whole blood_ALS	Homo sapiens	Sex: m	diagnosis: ALS	site_onset: s	age_onset: 47.74	survival_yr: 2.27505817932922	censored: 0
GSM3079932	whole blood_CON	Homo sapiens	Sex: v	diagnosis: CON	site_onset: NA	age_onset: NA	survival_yr: NA	censored: NA
GSM3079933	whole blood_MIM	Homo sapiens	Sex: m	diagnosis: MIM	site_onset: s	age_onset: 72.63	survival_yr: NA	censored: NA
GSM3079934	whole blood_CON	Homo sapiens	Sex: m	diagnosis: CON	site_onset: NA	age_onset: NA	survival_yr: NA	censored: NA
GSM3079935	whole blood_MIM	Homo sapiens	Sex: m	diagnosis: MIM	site_onset: NA	age_onset: NA	survival_yr: NA	censored: 1
GSM3079936	whole blood_ALS	Homo sapiens	Sex: m	diagnosis: ALS	site_onset: s	age_onset: 23.12	survival_yr: 3.83140314852841	censored: 1
GSM3079937	whole blood_ALS	Homo sapiens	Sex: v	diagnosis: ALS	site_onset: s	age_onset: 60.73	survival_yr: 1.9476180698152	censored: 0
GSM3079938	whole blood_CON	Homo sapiens	Sex: v	diagnosis: CON	site_onset: NA	age_onset: NA	survival_yr: NA	censored: NA
GSM3079939	whole blood_MIM	Homo sapiens	Sex: v	diagnosis: MIM	site_onset: NA	age_onset: NA	survival_yr: NA	censored: NA
GSM3079940	whole blood_MIM	Homo sapiens	Sex: m	diagnosis: MIM	site_onset: NA	age_onset: NA	survival_yr: NA	censored: NA
GSM3079941	whole blood_CON	Homo sapiens	Sex: m	diagnosis: CON	site_onset: NA	age_onset: NA	survival_yr: NA	censored: NA
GSM3079942	whole blood_CON	Homo sapiens	Sex: m	diagnosis: CON	site_onset: NA	age_onset: NA	survival_yr: NA	censored: NA
GSM3079943	whole blood_MIM	Homo sapiens	Sex: m	diagnosis: MIM	site_onset: NA	age_onset: NA	survival_yr: NA	censored: NA
GSM3079944	whole blood_ALS	Homo sapiens	Sex: v	diagnosis: ALS	site_onset: s	age_onset: 80.53	survival_yr: 1.5261259411362	censored: 0
GSM3079945	whole blood_ALS	Homo sapiens	Sex: m	diagnosis: ALS	site_onset: s	age_onset: 65.44	survival_yr: 2.02338124572211	censored: 0
GSM3079946	whole blood_CON	Homo sapiens	Sex: m	diagnosis: CON	site_onset: NA	age_onset: NA	survival_yr: NA	censored: NA
GSM3079947	whole blood_CON	Homo sapiens	Sex: v	diagnosis: CON	site_onset: NA	age_onset: NA	survival_yr: NA	censored: NA
GSM3079948	whole blood_CON	Homo sapiens	Sex: v	diagnosis: CON	site_onset: NA	age_onset: NA	survival_yr: NA	censored: NA
GSM3079949	whole blood_CON	Homo sapiens	Sex: m	diagnosis: CON	site_onset: NA	age_onset: NA	survival_yr: NA	censored: NA
GSM3079950	whole blood_ALS	Homo sapiens	Sex: m	diagnosis: ALS	site_onset: s	age_onset: 51.94	survival_yr: 4.07916495550992	censored: 0
GSM3079951	whole blood_CON	Homo sapiens	Sex: v	diagnosis: CON	site_onset: NA	age_onset: NA	survival_yr: NA	censored: NA
GSM3079952	whole blood_CON	Homo sapiens	Sex: m	diagnosis: CON	site_onset: NA	age_onset: NA	survival_yr: NA	censored: NA
GSM3079953	whole blood_ALS	Homo sapiens	Sex: v	diagnosis: ALS	site_onset: b	age_onset: 66.63	survival_yr: 2.15850102669405	censored: 0
GSM3079954	whole blood_ALS	Homo sapiens	Sex: m	diagnosis: ALS	site_onset: b	age_onset: 67.47	survival_yr: 1.72917864476386	censored: 0
GSM3079955	whole blood_CON	Homo sapiens	Sex: m	diagnosis: CON	site_onset: NA	age_onset: NA	survival_yr: NA	censored: NA
GSM3079956	whole blood_MIM	Homo sapiens	Sex: m	diagnosis: MIM	site_onset: NA	age_onset: NA	survival_yr: NA	censored: NA
GSM3079957	whole blood_ALS	Homo sapiens	Sex: m	diagnosis: ALS	site_onset: s	age_onset: 54.83	survival_yr: 5.50127994524298	censored: 1
GSM3079958	whole blood_ALS	Homo sapiens	Sex: v	diagnosis: ALS	site_onset: b	age_onset: 70.69	survival_yr: 0.923963039014382	censored: 0
GSM3079959	whole blood_CON	Homo sapiens	Sex: v	diagnosis: CON	site_onset: NA	age_onset: NA	survival_yr: NA	censored: NA
GSM3079960	whole blood_ALS	Homo sapiens	Sex: m	diagnosis: ALS	site_onset: s	age_onset: 81.02	survival_yr: 2.17233401779603	censored: 0
GSM3079961	whole blood_ALS	Homo sapiens	Sex: v	diagnosis: ALS	site_onset: b	age_onset: 79.33	survival_yr: 0.935571526351822	censored: 0
GSM3079962	whole blood_CON	Homo sapiens	Sex: m	diagnosis: CON	site_onset: NA	age_onset: NA	survival_yr: NA	censored: NA
GSM3079963	whole blood_MIM	Homo sapiens	Sex: m	diagnosis: MIM	site_onset: NA	age_onset: NA	survival_yr: NA	censored: NA
GSM3079964	whole blood_ALS	Homo sapiens	Sex: m	diagnosis: ALS	site_onset: s	age_onset: 64.81	survival_yr: 4.27966461327857	censored: 0
GSM3079965	whole blood_ALS	Homo sapiens	Sex: v	diagnosis: ALS	site_onset: b	age_onset: 63.78	survival_yr: 1.70939082819986	censored: 0
GSM3079966	whole blood_CON	Homo sapiens	Sex: m	diagnosis: CON	site_onset: NA	age_onset: NA	survival_yr: NA	censored: NA
GSM3079967	whole blood_ALS	Homo sapiens	Sex: m	diagnosis: ALS	site_onset: s	age_onset: 45.39	survival_yr: 3.2068514715948	censored: 0
GSM3079968	whole blood_ALS	Homo sapiens	Sex: v	diagnosis: ALS	site_onset: b	age_onset: 71.7	survival_yr: 1.44715947980835	censored: 0
GSM3079969	whole blood_CON	Homo sapiens	Sex: v	diagnosis: CON	site_onset: NA	age_onset: NA	survival_yr: NA	censored: NA
GSM3079970	whole blood_MIM	Homo sapiens	Sex: m	diagnosis: MIM	site_onset: NA	age_onset: NA	survival_yr: NA	censored: NA
GSM3079971	whole blood_ALS	Homo sapiens	Sex: v	diagnosis: ALS	site_onset: s	age_onset: 61.84	survival_yr: 1.16889801505818	censored: 0
GSM3079972	whole blood_ALS	Homo sapiens	Sex: m	diagnosis: ALS	site_onset: s	age_onset: 45.96	survival_yr: 2.67791923340178	censored: 1
GSM3079973	whole blood_CON	Homo sapiens	Sex: v	diagnosis: CON	site_onset: NA	age_onset: NA	survival_yr: NA	censored: NA
GSM3079974	whole blood_ALS	Homo sapiens	Sex: v	diagnosis: ALS	site_onset: s	age_onset: 68.15	survival_yr: 3.15184804928131	censored: 0
GSM3079975	whole blood_ALS	Homo sapiens	Sex: m	diagnosis: ALS	site_onset: s	age_onset: 67.37	survival_yr: 0.966755646817248	censored: 0
GSM3079976	whole blood_CON	Homo sapiens	Sex: v	diagnosis: CON	site_onset: NA	age_onset: NA	survival_yr: NA	censored: 0
GSM3079977	whole blood_MIM	Homo sapiens	Sex: m	diagnosis: MIM	site_onset: NA	age_onset: NA	survival_yr: NA	censored: NA
GSM3079978	whole blood_ALS	Homo sapiens	Sex: m	diagnosis: ALS	site_onset: s	age_onset: 81.78	survival_yr: 2.19262149212868	censored: 0
GSM3079979	whole blood_ALS	Homo sapiens	Sex: v	diagnosis: ALS	site_onset: b	age_onset: 60.84	survival_yr: 3.42009582477755	censored: 1
GSM3079980	whole blood_CON	Homo sapiens	Sex: m	diagnosis: CON	site_onset: NA	age_onset: NA	survival_yr: NA	censored: NA
GSM3079981	whole blood_ALS	Homo sapiens	Sex: v	diagnosis: ALS	site_onset: b	age_onset: 39.54	survival_yr: 3.31831622176591	censored: 1
GSM3079982	whole blood_ALS	Homo sapiens	Sex: m	diagnosis: ALS	site_onset: s	age_onset: 64.94	survival_yr: 3.38580424366872	censored: 1
GSM3079983	whole blood_CON	Homo sapiens	Sex: v	diagnosis: CON	site_onset: NA	age_onset: NA	survival_yr: NA	censored: NA
GSM3079984	whole blood_MIM	Homo sapiens	Sex: m	diagnosis: MIM	site_onset: NA	age_onset: NA	survival_yr: NA	censored: NA
GSM3079985	whole blood_ALS	Homo sapiens	Sex: m	diagnosis: ALS	site_onset: s	age_onset: 55.6	survival_yr: 0.744969199178641	censored: 0
GSM3079986	whole blood_ALS	Homo sapiens	Sex: m	diagnosis: ALS	site_onset: s	age_onset: 75.61	survival_yr: 1.2086173853525	censored: 0
GSM3079987	whole blood_CON	Homo sapiens	Sex: v	diagnosis: CON	site_onset: NA	age_onset: NA	survival_yr: NA	censored: NA
GSM3079988	whole blood_ALS	Homo sapiens	Sex: m	diagnosis: ALS	site_onset: s	age_onset: 70.65	survival_yr: 0.947535934291579	censored: 0
GSM3079989	whole blood_ALS	Homo sapiens	Sex: m	diagnosis: ALS	site_onset: s	age_onset: 59.93	survival_yr: 2.20004791238878	censored: 0
GSM3079990	whole blood_CON	Homo sapiens	Sex: m	diagnosis: CON	site_onset: NA	age_onset: NA	survival_yr: NA	censored: NA
GSM3079991	whole blood_MIM	Homo sapiens	Sex: m	diagnosis: MIM	site_onset: NA	age_onset: NA	survival_yr: NA	censored: NA
GSM3079992	whole blood_ALS	Homo sapiens	Sex: v	diagnosis: ALS	site_onset: s	age_onset: 39.35	survival_yr: 1.14281314168377	censored: 0
GSM3079993	whole blood_ALS	Homo sapiens	Sex: m	diagnosis: ALS	site_onset: s	age_onset: 73.97	survival_yr: 2.69529774127311	censored: 0
GSM3079994	whole blood_CON	Homo sapiens	Sex: v	diagnosis: CON	site_onset: NA	age_onset: NA	survival_yr: NA	censored: NA
GSM3079995	whole blood_ALS	Homo sapiens	Sex: v	diagnosis: ALS	site_onset: b	age_onset: 60.9	survival_yr: 1.63524982888433	censored: 0
GSM3079996	whole blood_ALS	Homo sapiens	Sex: m	diagnosis: ALS	site_onset: s	age_onset: 68.79	survival_yr: 2.24080082135524	censored: 0
GSM3079997	whole blood_CON	Homo sapiens	Sex: v	diagnosis: CON	site_onset: NA	age_onset: NA	survival_yr: NA	censored: NA
GSM3079998	whole blood_MIM	Homo sapiens	Sex: m	diagnosis: MIM	site_onset: NA	age_onset: NA	survival_yr: NA	censored: NA
GSM3079999	whole blood_ALS	Homo sapiens	Sex: m	diagnosis: ALS	site_onset: s	age_onset: 37.82	survival_yr: 3.36001368925393	censored: 1
GSM3080000	whole blood_ALS	Homo sapiens	Sex: v	diagnosis: ALS	site_onset: b	age_onset: 80.33	survival_yr: 2.46534565366187	censored: 0
GSM3080001	whole blood_CON	Homo sapiens	Sex: v	diagnosis: CON	site_onset: NA	age_onset: NA	survival_yr: NA	censored: NA
GSM3080002	whole blood_ALS	Homo sapiens	Sex: m	diagnosis: ALS	site_onset: s	age_onset: 58.22	survival_yr: 4.0743189596167	censored: 0
GSM3080003	whole blood_ALS	Homo sapiens	Sex: v	diagnosis: ALS	site_onset: s	age_onset: 49.01	survival_yr: 2.68609856262834	censored: 0
GSM3080004	whole blood_CON	Homo sapiens	Sex: m	diagnosis: CON	site_onset: NA	age_onset: NA	survival_yr: NA	censored: NA
GSM3080005	whole blood_MIM	Homo sapiens	Sex: m	diagnosis: MIM	site_onset: NA	age_onset: NA	survival_yr: NA	censored: NA
GSM3080006	whole blood_ALS	Homo sapiens	Sex: v	diagnosis: ALS	site_onset: s	age_onset: 70.99	survival_yr: 1.43984257357974	censored: 0
GSM3080007	whole blood_CON	Homo sapiens	Sex: m	diagnosis: CON	site_onset: NA	age_onset: NA	survival_yr: NA	censored: NA
GSM3080008	whole blood_ALS	Homo sapiens	Sex: m	diagnosis: ALS	site_onset: s	age_onset: 59.65	survival_yr: 1.97628336755647	censored: 0
GSM3080009	whole blood_ALS	Homo sapiens	Sex: v	diagnosis: ALS	site_onset: b	age_onset: 68.7	survival_yr: 2.23223819301847	censored: 0
GSM3080010	whole blood_CON	Homo sapiens	Sex: v	diagnosis: CON	site_onset: NA	age_onset: NA	survival_yr: NA	censored: NA
GSM3080011	whole blood_MIM	Homo sapiens	Sex: m	diagnosis: MIM	site_onset: NA	age_onset: NA	survival_yr: NA	censored: NA
GSM3080012	whole blood_ALS	Homo sapiens	Sex: m	diagnosis: ALS	site_onset: s	age_onset: 74.56	survival_yr: 2.98962354551676	censored: 0
GSM3080013	whole blood_ALS	Homo sapiens	Sex: m	diagnosis: ALS	site_onset: s	age_onset: 66.28	survival_yr: 2.0704449007529	censored: 0
GSM3080014	whole blood_CON	Homo sapiens	Sex: m	diagnosis: CON	site_onset: NA	age_onset: NA	survival_yr: NA	censored: NA
GSM3080015	whole blood_ALS	Homo sapiens	Sex: v	diagnosis: ALS	site_onset: b	age_onset: 66.08	survival_yr: 2.34436687200548	censored: 0
GSM3080016	whole blood_CON	Homo sapiens	Sex: v	diagnosis: CON	site_onset: NA	age_onset: NA	survival_yr: NA	censored: NA
GSM3080017	whole blood_CON	Homo sapiens	Sex: m	diagnosis: CON	site_onset: NA	age_onset: NA	survival_yr: NA	censored: NA
GSM3080018	whole blood_MIM	Homo sapiens	Sex: m	diagnosis: MIM	site_onset: NA	age_onset: NA	survival_yr: NA	censored: NA
GSM3080019	whole blood_ALS	Homo sapiens	Sex: v	diagnosis: ALS	site_onset: b	age_onset: 70.27	survival_yr: 4.86757700205339	censored: 0
GSM3080020	whole blood_ALS	Homo sapiens	Sex: m	diagnosis: ALS	site_onset: s	age_onset: 55.41	survival_yr: 2.76111567419576	censored: 1
GSM3080021	whole blood_CON	Homo sapiens	Sex: v	diagnosis: CON	site_onset: NA	age_onset: NA	survival_yr: NA	censored: NA
GSM3080022	whole blood_ALS	Homo sapiens	Sex: v	diagnosis: ALS	site_onset: b	age_onset: 66.09	survival_yr: 1.32957563312799	censored: 0
GSM3080023	whole blood_ALS	Homo sapiens	Sex: m	diagnosis: ALS	site_onset: s	age_onset: 69.82	survival_yr: 2.33879534565366	censored: 1
GSM3080024	whole blood_CON	Homo sapiens	Sex: m	diagnosis: CON	site_onset: NA	age_onset: NA	survival_yr: NA	censored: NA
GSM3080025	whole blood_CON	Homo sapiens	Sex: m	diagnosis: CON	site_onset: NA	age_onset: NA	survival_yr: NA	censored: NA
GSM3080026	whole blood_CON	Homo sapiens	Sex: m	diagnosis: CON	site_onset: NA	age_onset: NA	survival_yr: NA	censored: NA
GSM3080027	whole blood_ALS	Homo sapiens	Sex: v	diagnosis: ALS	site_onset: s	age_onset: 66.71	survival_yr: 3.50218343600274	censored: 1
GSM3080028	whole blood_ALS	Homo sapiens	Sex: v	diagnosis: ALS	site_onset: b	age_onset: 61.83	survival_yr: 2.13988364134155	censored: 1
GSM3080029	whole blood_ALS	Homo sapiens	Sex: m	diagnosis: ALS	site_onset: s	age_onset: 61.5	survival_yr: 1.47330595482546	censored: 0
GSM3080030	whole blood_CON	Homo sapiens	Sex: m	diagnosis: CON	site_onset: NA	age_onset: NA	survival_yr: NA	censored: NA
GSM3080031	whole blood_CON	Homo sapiens	Sex: v	diagnosis: CON	site_onset: NA	age_onset: NA	survival_yr: NA	censored: NA
GSM3080032	whole blood_CON	Homo sapiens	Sex: m	diagnosis: CON	site_onset: NA	age_onset: NA	survival_yr: NA	censored: NA
GSM3080033	whole blood_CON	Homo sapiens	Sex: m	diagnosis: CON	site_onset: NA	age_onset: NA	survival_yr: NA	censored: NA
GSM3080034	whole blood_ALS	Homo sapiens	Sex: m	diagnosis: ALS	site_onset: b	age_onset: 68.25	survival_yr: 1.34890485968515	censored: 0
GSM3080035	whole blood_CON	Homo sapiens	Sex: v	diagnosis: CON	site_onset: NA	age_onset: NA	survival_yr: NA	censored: 1
GSM3080036	whole blood_CON	Homo sapiens	Sex: m	diagnosis: CON	site_onset: NA	age_onset: NA	survival_yr: NA	censored: NA
GSM3080037	whole blood_MIM	Homo sapiens	Sex: m	diagnosis: MIM	site_onset: NA	age_onset: NA	survival_yr: NA	censored: NA
GSM3080038	whole blood_ALS	Homo sapiens	Sex: m	diagnosis: ALS	site_onset: s	age_onset: 61.82	survival_yr: 3.21490759753593	censored: 0
GSM3080039	whole blood_ALS	Homo sapiens	Sex: v	diagnosis: ALS	site_onset: b	age_onset: 67.47	survival_yr: 2.43554414784394	censored: 0
GSM3080040	whole blood_MIM	Homo sapiens	Sex: v	diagnosis: MIM	site_onset: NA	age_onset: NA	survival_yr: NA	censored: NA
GSM3080041	whole blood_ALS	Homo sapiens	Sex: v	diagnosis: ALS	site_onset: s	age_onset: 54.44	survival_yr: 4.34439425051335	censored: 1
GSM3080042	whole blood_MIM	Homo sapiens	Sex: m	diagnosis: MIM	site_onset: NA	age_onset: NA	survival_yr: NA	censored: NA
GSM3080043	whole blood_ALS	Homo sapiens	Sex: m	diagnosis: ALS	site_onset: s	age_onset: 60.01	survival_yr: 3.48623545516769	censored: 0
GSM3080044	whole blood_ALS	Homo sapiens	Sex: v	diagnosis: ALS	site_onset: s	age_onset: 51.71	survival_yr: 0.892327173169065	censored: 0
GSM3080045	whole blood_CON	Homo sapiens	Sex: m	diagnosis: CON	site_onset: NA	age_onset: NA	survival_yr: NA	censored: NA
GSM3080046	whole blood_MIM	Homo sapiens	Sex: v	diagnosis: MIM	site_onset: NA	age_onset: NA	survival_yr: NA	censored: NA
GSM3080047	whole blood_ALS	Homo sapiens	Sex: m	diagnosis: ALS	site_onset: s	age_onset: 60.1	survival_yr: 1.55366187542779	censored: 0
GSM3080048	whole blood_MIM	Homo sapiens	Sex: m	diagnosis: MIM	site_onset: NA	age_onset: NA	survival_yr: NA	censored: NA
GSM3080049	whole blood_MIM	Homo sapiens	Sex: m	diagnosis: MIM	site_onset: NA	age_onset: NA	survival_yr: NA	censored: NA
GSM3080050	whole blood_ALS	Homo sapiens	Sex: m	diagnosis: ALS	site_onset: s	age_onset: 61.2	survival_yr: 3.00807665982204	censored: 0
GSM3080051	whole blood_MIM	Homo sapiens	Sex: m	diagnosis: MIM	site_onset: NA	age_onset: NA	survival_yr: NA	censored: NA
GSM3080052	whole blood_CON	Homo sapiens	Sex: m	diagnosis: CON	site_onset: NA	age_onset: NA	survival_yr: NA	censored: NA
GSM3080053	whole blood_MIM	Homo sapiens	Sex: m	diagnosis: MIM	site_onset: NA	age_onset: NA	survival_yr: NA	censored: NA
GSM3080054	whole blood_ALS	Homo sapiens	Sex: m	diagnosis: ALS	site_onset: b	age_onset: 51.41	survival_yr: 4.56535934291581	censored: 0
GSM3080055	whole blood_MIM	Homo sapiens	Sex: m	diagnosis: MIM	site_onset: NA	age_onset: NA	survival_yr: NA	censored: NA
GSM3080056	whole blood_ALS	Homo sapiens	Sex: v	diagnosis: ALS	site_onset: b	age_onset: 71.99	survival_yr: 2.62190965092402	censored: 0
GSM3080057	whole blood_ALS	Homo sapiens	Sex: v	diagnosis: ALS	site_onset: b	age_onset: 61.3	survival_yr: 3.38446269678303	censored: 0
GSM3080058	whole blood_CON	Homo sapiens	Sex: v	diagnosis: CON	site_onset: NA	age_onset: NA	survival_yr: NA	censored: NA
GSM3080059	whole blood_ALS	Homo sapiens	Sex: v	diagnosis: ALS	site_onset: s	age_onset: 67	survival_yr: 3.81998631074606	censored: 0
GSM3080060	whole blood_ALS	Homo sapiens	Sex: v	diagnosis: ALS	site_onset: s	age_onset: 64.22	survival_yr: 5.42544832306639	censored: 0
GSM3080061	whole blood_ALS	Homo sapiens	Sex: v	diagnosis: ALS	site_onset: b	age_onset: 66.62	survival_yr: 2.86939082819985	censored: 0
GSM3080062	whole blood_CON	Homo sapiens	Sex: m	diagnosis: CON	site_onset: NA	age_onset: NA	survival_yr: NA	censored: NA
GSM3080063	whole blood_MIM	Homo sapiens	Sex: v	diagnosis: MIM	site_onset: s	age_onset: 75.69	survival_yr: 1.82950718685832	censored: 1
GSM3080064	whole blood_ALS	Homo sapiens	Sex: m	diagnosis: ALS	site_onset: b	age_onset: 73.93	survival_yr: 1.23769336071183	censored: 0
GSM3080065	whole blood_ALS	Homo sapiens	Sex: v	diagnosis: ALS	site_onset: s	age_onset: 60.17	survival_yr: 1.48639972621492	censored: 0
GSM3080066	whole blood_MIM	Homo sapiens	Sex: v	diagnosis: MIM	site_onset: NA	age_onset: NA	survival_yr: NA	censored: NA
GSM3080067	whole blood_ALS	Homo sapiens	Sex: m	diagnosis: ALS	site_onset: s	age_onset: 66.11	survival_yr: 5.51765229295003	censored: 0
GSM3080068	whole blood_MIM	Homo sapiens	Sex: m	diagnosis: MIM	site_onset: NA	age_onset: NA	survival_yr: NA	censored: NA
GSM3080069	whole blood_ALS	Homo sapiens	Sex: m	diagnosis: ALS	site_onset: s	age_onset: 43.76	survival_yr: 3.92240930869268	censored: 0
GSM3080070	whole blood_ALS	Homo sapiens	Sex: v	diagnosis: ALS	site_onset: b	age_onset: 50.81	survival_yr: 2.28514031485284	censored: 0
GSM3080071	whole blood_CON	Homo sapiens	Sex: m	diagnosis: CON	site_onset: NA	age_onset: NA	survival_yr: NA	censored: NA
GSM3080072	whole blood_ALS	Homo sapiens	Sex: m	diagnosis: ALS	site_onset: s	age_onset: 58.19	survival_yr: 1.56633127994525	censored: 0
GSM3080073	whole blood_MIM	Homo sapiens	Sex: m	diagnosis: MIM	site_onset: NA	age_onset: NA	survival_yr: NA	censored: NA
GSM3080074	whole blood_ALS	Homo sapiens	Sex: m	diagnosis: ALS	site_onset: b	age_onset: 64.24	survival_yr: 1.82160164271048	censored: 0
GSM3080075	whole blood_ALS	Homo sapiens	Sex: m	diagnosis: ALS	site_onset: s	age_onset: 82.13	survival_yr: 3.00620807665983	censored: 0
GSM3080076	whole blood_MIM	Homo sapiens	Sex: m	diagnosis: MIM	site_onset: NA	age_onset: NA	survival_yr: NA	censored: NA
GSM3080077	whole blood_ALS	Homo sapiens	Sex: m	diagnosis: ALS	site_onset: b	age_onset: 40.55	survival_yr: 2.40414099931554	censored: 0
GSM3080078	whole blood_CON	Homo sapiens	Sex: m	diagnosis: CON	site_onset: NA	age_onset: NA	survival_yr: NA	censored: NA
GSM3080079	whole blood_MIM	Homo sapiens	Sex: m	diagnosis: MIM	site_onset: NA	age_onset: 16.34	survival_yr: 34.8632854209446	censored: 1
GSM3080080	whole blood_ALS	Homo sapiens	Sex: m	diagnosis: ALS	site_onset: b	age_onset: 64.89	survival_yr: 0.875913757700204	censored: 0
GSM3080081	whole blood_CON	Homo sapiens	Sex: m	diagnosis: CON	site_onset: NA	age_onset: NA	survival_yr: NA	censored: NA
GSM3080082	whole blood_CON	Homo sapiens	Sex: v	diagnosis: CON	site_onset: NA	age_onset: NA	survival_yr: NA	censored: NA
GSM3080083	whole blood_MIM	Homo sapiens	Sex: v	diagnosis: MIM	site_onset: NA	age_onset: NA	survival_yr: NA	censored: NA
GSM3080084	whole blood_ALS	Homo sapiens	Sex: m	diagnosis: ALS	site_onset: s	age_onset: 43.63	survival_yr: 3.57328542094456	censored: 1
GSM3080085	whole blood_CON	Homo sapiens	Sex: m	diagnosis: CON	site_onset: NA	age_onset: NA	survival_yr: NA	censored: NA
GSM3080086	whole blood_ALS	Homo sapiens	Sex: m	diagnosis: ALS	site_onset: b	age_onset: 52.93	survival_yr: 1.59156057494867	censored: 0
GSM3080087	whole blood_ALS	Homo sapiens	Sex: m	diagnosis: ALS	site_onset: s	age_onset: 58.5	survival_yr: 1.83949349760438	censored: 1
GSM3080088	whole blood_CON	Homo sapiens	Sex: m	diagnosis: CON	site_onset: NA	age_onset: NA	survival_yr: NA	censored: NA
GSM3080089	whole blood_CON	Homo sapiens	Sex: m	diagnosis: CON	site_onset: NA	age_onset: NA	survival_yr: NA	censored: NA
GSM3080090	whole blood_CON	Homo sapiens	Sex: v	diagnosis: CON	site_onset: NA	age_onset: NA	survival_yr: NA	censored: NA
GSM3080091	whole blood_CON	Homo sapiens	Sex: m	diagnosis: CON	site_onset: NA	age_onset: NA	survival_yr: NA	censored: NA
GSM3080092	whole blood_CON	Homo sapiens	Sex: v	diagnosis: CON	site_onset: NA	age_onset: NA	survival_yr: NA	censored: NA
GSM3080093	whole blood_ALS	Homo sapiens	Sex: m	diagnosis: ALS	site_onset: s	age_onset: 71.86	survival_yr: 1.11467488021903	censored: 0
GSM3080094	whole blood_CON	Homo sapiens	Sex: v	diagnosis: CON	site_onset: NA	age_onset: NA	survival_yr: NA	censored: NA
GSM3080095	whole blood_CON	Homo sapiens	Sex: m	diagnosis: CON	site_onset: NA	age_onset: NA	survival_yr: NA	censored: NA
GSM3080096	whole blood_CON	Homo sapiens	Sex: m	diagnosis: CON	site_onset: NA	age_onset: NA	survival_yr: NA	censored: NA
GSM3080097	whole blood_CON	Homo sapiens	Sex: m	diagnosis: CON	site_onset: NA	age_onset: NA	survival_yr: NA	censored: NA
GSM3080098	whole blood_ALS	Homo sapiens	Sex: m	diagnosis: ALS	site_onset: s	age_onset: 61.22	survival_yr: 3.2235318275154	censored: 0
GSM3080099	whole blood_ALS	Homo sapiens	Sex: v	diagnosis: ALS	site_onset: b	age_onset: 72.23	survival_yr: 5.13071184120464	censored: 0
GSM3080100	whole blood_CON	Homo sapiens	Sex: v	diagnosis: CON	site_onset: NA	age_onset: NA	survival_yr: NA	censored: NA
GSM3080101	whole blood_MIM	Homo sapiens	Sex: m	diagnosis: MIM	site_onset: NA	age_onset: NA	survival_yr: NA	censored: NA
GSM3080102	whole blood_ALS	Homo sapiens	Sex: m	diagnosis: ALS	site_onset: s	age_onset: 64.63	survival_yr: 3.81079397672828	censored: 0
GSM3080103	whole blood_ALS	Homo sapiens	Sex: m	diagnosis: ALS	site_onset: s	age_onset: 53.54	survival_yr: 3.17457905544148	censored: 1
GSM3080104	whole blood_CON	Homo sapiens	Sex: v	diagnosis: CON	site_onset: NA	age_onset: NA	survival_yr: NA	censored: NA
GSM3080105	whole blood_ALS	Homo sapiens	Sex: m	diagnosis: ALS	site_onset: s	age_onset: 64.35	survival_yr: 3.28039014373716	censored: 0
GSM3080106	whole blood_CON	Homo sapiens	Sex: m	diagnosis: CON	site_onset: NA	age_onset: NA	survival_yr: NA	censored: NA
GSM3080107	whole blood_MIM	Homo sapiens	Sex: m	diagnosis: MIM	site_onset: NA	age_onset: NA	survival_yr: NA	censored: NA
GSM3080108	whole blood_ALS	Homo sapiens	Sex: v	diagnosis: ALS	site_onset: s	age_onset: 66.7	survival_yr: 2.20622861054072	censored: 0
GSM3080109	whole blood_ALS	Homo sapiens	Sex: v	diagnosis: ALS	site_onset: b	age_onset: 77.18	survival_yr: 2.33266255989048	censored: 0
GSM3080110	whole blood_CON	Homo sapiens	Sex: m	diagnosis: CON	site_onset: NA	age_onset: NA	survival_yr: NA	censored: NA
GSM3080111	whole blood_ALS	Homo sapiens	Sex: v	diagnosis: ALS	site_onset: s	age_onset: 46.4	survival_yr: 2.29267624914442	censored: 0
GSM3080112	whole blood_CON	Homo sapiens	Sex: v	diagnosis: CON	site_onset: NA	age_onset: NA	survival_yr: NA	censored: NA
GSM3080113	whole blood_ALS	Homo sapiens	Sex: m	diagnosis: ALS	site_onset: s	age_onset: 73.96	survival_yr: 2.28093086926764	censored: 0
GSM3080114	whole blood_MIM	Homo sapiens	Sex: m	diagnosis: MIM	site_onset: NA	age_onset: NA	survival_yr: NA	censored: NA
GSM3080115	whole blood_ALS	Homo sapiens	Sex: v	diagnosis: ALS	site_onset: b	age_onset: 66.55	survival_yr: 2.35896646132787	censored: 0
GSM3080116	whole blood_CON	Homo sapiens	Sex: v	diagnosis: CON	site_onset: NA	age_onset: NA	survival_yr: NA	censored: 1
GSM3080117	whole blood_CON	Homo sapiens	Sex: m	diagnosis: CON	site_onset: NA	age_onset: NA	survival_yr: NA	censored: NA
GSM3080118	whole blood_MIM	Homo sapiens	Sex: v	diagnosis: MIM	site_onset: NA	age_onset: NA	survival_yr: NA	censored: NA
GSM3080119	whole blood_ALS	Homo sapiens	Sex: m	diagnosis: ALS	site_onset: s	age_onset: 62.91	survival_yr: 3.87165639972622	censored: 0
GSM3080120	whole blood_ALS	Homo sapiens	Sex: m	diagnosis: ALS	site_onset: s	age_onset: 60.91	survival_yr: 4.38774127310062	censored: 1
GSM3080121	whole blood_CON	Homo sapiens	Sex: m	diagnosis: CON	site_onset: NA	age_onset: NA	survival_yr: NA	censored: NA
GSM3080122	whole blood_ALS	Homo sapiens	Sex: m	diagnosis: ALS	site_onset: b	age_onset: 78.12	survival_yr: 1.63633127994524	censored: 0
GSM3080123	whole blood_CON	Homo sapiens	Sex: v	diagnosis: CON	site_onset: NA	age_onset: NA	survival_yr: NA	censored: NA
GSM3080124	whole blood_ALS	Homo sapiens	Sex: m	diagnosis: ALS	site_onset: b	age_onset: 54.56	survival_yr: 2.35444216290212	censored: 0
GSM3080125	whole blood_ALS	Homo sapiens	Sex: m	diagnosis: ALS	site_onset: s	age_onset: 33.81	survival_yr: 2.75673511293634	censored: 1
GSM3080126	whole blood_CON	Homo sapiens	Sex: v	diagnosis: CON	site_onset: NA	age_onset: NA	survival_yr: NA	censored: NA
GSM3080127	whole blood_ALS	Homo sapiens	Sex: m	diagnosis: ALS	site_onset: s	age_onset: 73.06	survival_yr: 2.26375085557837	censored: 0
GSM3080128	whole blood_CON	Homo sapiens	Sex: m	diagnosis: CON	site_onset: NA	age_onset: NA	survival_yr: NA	censored: NA
GSM3080129	whole blood_MIM	Homo sapiens	Sex: m	diagnosis: MIM	site_onset: s	age_onset: 50.83	survival_yr: 20.2391307323751	censored: 1
GSM3080130	whole blood_ALS	Homo sapiens	Sex: v	diagnosis: ALS	site_onset: s	age_onset: 50.41	survival_yr: 2.14852156057495	censored: 0
GSM3080131	whole blood_CON	Homo sapiens	Sex: m	diagnosis: CON	site_onset: NA	age_onset: NA	survival_yr: NA	censored: NA
GSM3080132	whole blood_CON	Homo sapiens	Sex: m	diagnosis: CON	site_onset: NA	age_onset: NA	survival_yr: NA	censored: NA
GSM3080133	whole blood_MIM	Homo sapiens	Sex: m	diagnosis: MIM	site_onset: NA	age_onset: NA	survival_yr: NA	censored: NA
GSM3080134	whole blood_ALS	Homo sapiens	Sex: m	diagnosis: ALS	site_onset: s	age_onset: 60.43	survival_yr: 1.36876796714579	censored: 0
GSM3080135	whole blood_ALS	Homo sapiens	Sex: v	diagnosis: ALS	site_onset: b	age_onset: 63.34	survival_yr: 3.06657084188912	censored: 0
GSM3080136	whole blood_CON	Homo sapiens	Sex: m	diagnosis: CON	site_onset: NA	age_onset: NA	survival_yr: NA	censored: NA
GSM3080137	whole blood_CON	Homo sapiens	Sex: m	diagnosis: CON	site_onset: NA	age_onset: NA	survival_yr: NA	censored: NA
GSM3080138	whole blood_MIM	Homo sapiens	Sex: m	diagnosis: MIM	site_onset: NA	age_onset: NA	survival_yr: NA	censored: NA
GSM3080139	whole blood_ALS	Homo sapiens	Sex: m	diagnosis: ALS	site_onset: s	age_onset: 65.16	survival_yr: 1.7914031485284	censored: 0
GSM3080140	whole blood_CON	Homo sapiens	Sex: v	diagnosis: CON	site_onset: NA	age_onset: NA	survival_yr: NA	censored: NA
GSM3080141	whole blood_ALS	Homo sapiens	Sex: m	diagnosis: ALS	site_onset: s	age_onset: 74.08	survival_yr: 0.548336755646815	censored: 0
GSM3080142	whole blood_CON	Homo sapiens	Sex: m	diagnosis: CON	site_onset: NA	age_onset: NA	survival_yr: NA	censored: NA
GSM3080143	whole blood_MIM	Homo sapiens	Sex: v	diagnosis: MIM	site_onset: NA	age_onset: NA	survival_yr: NA	censored: NA
GSM3080144	whole blood_ALS	Homo sapiens	Sex: v	diagnosis: ALS	site_onset: b	age_onset: 49.96	survival_yr: 2.54650239561943	censored: 0
GSM3080145	whole blood_CON	Homo sapiens	Sex: v	diagnosis: CON	site_onset: NA	age_onset: NA	survival_yr: NA	censored: NA
GSM3080146	whole blood_CON	Homo sapiens	Sex: m	diagnosis: CON	site_onset: NA	age_onset: NA	survival_yr: NA	censored: NA
GSM3080147	whole blood_MIM	Homo sapiens	Sex: m	diagnosis: MIM	site_onset: NA	age_onset: NA	survival_yr: NA	censored: NA
GSM3080148	whole blood_ALS	Homo sapiens	Sex: m	diagnosis: ALS	site_onset: b	age_onset: 58.56	survival_yr: 2.62822724161533	censored: 0
GSM3080149	whole blood_ALS	Homo sapiens	Sex: m	diagnosis: ALS	site_onset: s	age_onset: 50.19	survival_yr: 1.79904859685147	censored: 0
GSM3080150	whole blood_CON	Homo sapiens	Sex: v	diagnosis: CON	site_onset: NA	age_onset: NA	survival_yr: NA	censored: NA
GSM3080151	whole blood_CON	Homo sapiens	Sex: m	diagnosis: CON	site_onset: NA	age_onset: NA	survival_yr: NA	censored: NA
GSM3080152	whole blood_CON	Homo sapiens	Sex: m	diagnosis: CON	site_onset: NA	age_onset: NA	survival_yr: NA	censored: NA
GSM3080153	whole blood_ALS	Homo sapiens	Sex: v	diagnosis: ALS	site_onset: b	age_onset: 59.63	survival_yr: 1.45966461327858	censored: 0
GSM3080154	whole blood_CON	Homo sapiens	Sex: v	diagnosis: CON	site_onset: NA	age_onset: NA	survival_yr: NA	censored: NA
GSM3080155	whole blood_CON	Homo sapiens	Sex: m	diagnosis: CON	site_onset: NA	age_onset: NA	survival_yr: NA	censored: NA
GSM3080156	whole blood_CON	Homo sapiens	Sex: m	diagnosis: CON	site_onset: NA	age_onset: NA	survival_yr: NA	censored: NA
GSM3080157	whole blood_CON	Homo sapiens	Sex: m	diagnosis: CON	site_onset: NA	age_onset: NA	survival_yr: NA	censored: NA
GSM3080158	whole blood_CON	Homo sapiens	Sex: v	diagnosis: CON	site_onset: NA	age_onset: NA	survival_yr: NA	censored: NA
GSM3080159	whole blood_CON	Homo sapiens	Sex: m	diagnosis: CON	site_onset: NA	age_onset: NA	survival_yr: NA	censored: NA
GSM3080160	whole blood_ALS	Homo sapiens	Sex: v	diagnosis: ALS	site_onset: b	age_onset: 77.01	survival_yr: 1.40478439425051	censored: 0
GSM3080161	whole blood_CON	Homo sapiens	Sex: v	diagnosis: CON	site_onset: NA	age_onset: NA	survival_yr: NA	censored: NA
GSM3080162	whole blood_CON	Homo sapiens	Sex: m	diagnosis: CON	site_onset: NA	age_onset: NA	survival_yr: NA	censored: NA
GSM3080163	whole blood_CON	Homo sapiens	Sex: v	diagnosis: CON	site_onset: NA	age_onset: NA	survival_yr: NA	censored: NA
GSM3080164	whole blood_CON	Homo sapiens	Sex: v	diagnosis: CON	site_onset: NA	age_onset: NA	survival_yr: NA	censored: NA
GSM3080165	whole blood_CON	Homo sapiens	Sex: m	diagnosis: CON	site_onset: NA	age_onset: NA	survival_yr: NA	censored: NA
GSM3080166	whole blood_CON	Homo sapiens	Sex: m	diagnosis: CON	site_onset: NA	age_onset: NA	survival_yr: NA	censored: NA
GSM3080167	whole blood_CON	Homo sapiens	Sex: v	diagnosis: CON	site_onset: NA	age_onset: NA	survival_yr: NA	censored: NA
GSM3080168	whole blood_ALS	Homo sapiens	Sex: v	diagnosis: ALS	site_onset: s	age_onset: 70.5	survival_yr: 3.05509924709104	censored: 0
GSM3080169	whole blood_CON	Homo sapiens	Sex: m	diagnosis: CON	site_onset: NA	age_onset: NA	survival_yr: NA	censored: NA
GSM3080170	whole blood_CON	Homo sapiens	Sex: m	diagnosis: CON	site_onset: NA	age_onset: NA	survival_yr: NA	censored: NA
GSM3080171	whole blood_CON	Homo sapiens	Sex: m	diagnosis: CON	site_onset: NA	age_onset: NA	survival_yr: NA	censored: NA
GSM3080172	whole blood_CON	Homo sapiens	Sex: m	diagnosis: CON	site_onset: NA	age_onset: NA	survival_yr: NA	censored: NA
GSM3080173	whole blood_CON	Homo sapiens	Sex: v	diagnosis: CON	site_onset: NA	age_onset: NA	survival_yr: NA	censored: NA
GSM3080174	whole blood_CON	Homo sapiens	Sex: m	diagnosis: CON	site_onset: NA	age_onset: NA	survival_yr: NA	censored: NA
GSM3080175	whole blood_CON	Homo sapiens	Sex: v	diagnosis: CON	site_onset: NA	age_onset: NA	survival_yr: NA	censored: NA
GSM3080176	whole blood_CON	Homo sapiens	Sex: m	diagnosis: CON	site_onset: NA	age_onset: NA	survival_yr: NA	censored: NA
GSM3080177	whole blood_CON	Homo sapiens	Sex: v	diagnosis: CON	site_onset: NA	age_onset: NA	survival_yr: NA	censored: NA
GSM3080178	whole blood_CON	Homo sapiens	Sex: m	diagnosis: CON	site_onset: NA	age_onset: NA	survival_yr: NA	censored: NA
GSM3080179	whole blood_CON	Homo sapiens	Sex: m	diagnosis: CON	site_onset: NA	age_onset: NA	survival_yr: NA	censored: NA
GSM3080180	whole blood_ALS	Homo sapiens	Sex: m	diagnosis: ALS	site_onset: s	age_onset: 74.85	survival_yr: 1.42926078028748	censored: 0

## Sheet: Supplementary Table S2
Supplementary Table S2. List of Ubiquitination-Related Genes
gene
RNF14
UBE2Q1
RNF10
RNF11
RNF13
UCHL5
UBE2Q2
RNF115
RAB40C
RAB40B
FBXL12
FBXL15
FBXL17
RNF114
CADPS2
MGRN1
CUEDC2
CBLB
IFT80
TAF1D
RNF128
FBXO6
CHFR
SKP2
LRSAM1
UBE2NL
UFSP1
UFSP2
PI4K2B
BCL6
AIRE
FBXL19
SEH1L
USP17L3
RNF130
RNF135
RNF138
RNF139
MYO1F
MYO1E
MYO1C
FAM188A
SRC
USP12
SRM
ASAP1
ASAP2
ITCH
NOD1
PARD6B
WRAP53
TAX1BP1
ZFAND6
ZFAND5
ARHGAP26
PCGF3
PCGF2
MYSM1
RLIM
PCGF6
2026-03-11
CHD3
CHD5
CHD4
CAP1
STC1
ELP2
PLRG1
GGA1
GGA3
GGA2
CORO7
LTN1
NACC2
NACC1
SH3KBP1
SCAF11
ZBTB33
KLHL35
KLHL31
PHRF1
KLHL38
DNAJC6
DNAJC2
CUEDC1
TRIM43
RNF157
SPAG16
UBFD1
GZF1
TFG
DCAF10
LRRC41
FBXL2
DCAF16
WRAP73
TRIM7
AAMP
LLGL2
LLGL1
NSMCE2
PRKAA2
PRKAA1
SORBS1
SORBS3
ATG16L1
ATG16L2
UBE2J1
FBXO10
FBXO15
PARD6A
CDC16
HLTF
UBQLNL
DPF2
DPF3
DPF1
VPS41
VHL
UBE2A
UBE2B
RNF170
ZBTB7A
ZBTB7C
ZBTB7B
UFD1L
ZRANB1
ZRANB3
UBE2G2
TMEM189-UBE2V1
RNF8
RNF6
RNF7
RNF5
RNF2
USP27X
SIK1
SIK3
RNF145
BIRC7
CPNE1
TECR
YAF2
UBE2D2
UBE2D3
UBE2D1
MLL3
MLL2
MLL4
DNAI1
TMEM129
VPRBP
FBXO30
FBXO31
FBXO33
DTX4
CDC34
LONRF3
LONRF2
LONRF1
BIRC2
WDR3
DYNC1I2
PPP1R13L
RIMBP3B
RIMBP3C
RNF19B
RASD2
LASP1
NSD1
SLX4
FAM53C
RNF125
RNFT2
AURKA
ABI2
ABI3
ABI1
BRCA1
RBBP7
RBBP6
RBBP4
DDI2
DDI1
SKAP2
C10orf90
SMURF1
DCAF12L1
SMURF2
NARF
TOLLIP
OPTN
WDR37
WDR36
KLHL25
KLHL24
GPR75-ASB3
KLHL23
OASL
CCIN
PCGF1
PCGF5
TRIM55
UBAP2
UBAP1
ZBTB38
ZBTB34
KLHL34
TRIM46
TRIM47
TRIM44
TRIM45
TRIM40
TRIM41
VCP
PEX2
PEX7
NEB
TBK1
HIRA
LATS2
LATS1
TSSC1
RNF103
KBTBD13
CASS4
RC3H1
ISG15
TRIM13
MAP1LC3A
MAP1LC3C
MAP1LC3B
BRCC3
SPG20
WDR33
WDR38
NPHP1
TLE3
TLE1
TLE4
GCH1
WHSC1
APC2
LRWD1
TMUB1
TMUB2
RYBP
FUS
STAM
ARIH2
ARIH1
ZBTB11
ZBTB17
ZBTB14
ZBTB18
KLHL10
KLHL13
KLHL14
KLHL15
KLHL17
TRIM68
TRIM62
TRIM63
TRIM65
TRIM66
RNF175
PARK2
MDM4
WDR91
WDR90
CRK
ASPSCR1
CAPS2
MARK4
MARK1
MARK2
MARK3
BRWD3
WDR13
WDR12
WDR11
WDR17
JHDM1D
USP9X
USP9Y
RHOBTB2
RHOBTB3
RHOBTB1
KCTD13
KCTD10
KCTD17
CCR6
TAF5
TAF3
USP10
NPLOC4
SMU1
STAC
N4BP2
CBLC
CRKL
ZSWIM2
EFCAB8
BACH2
BACH1
ANAPC2
ANAPC5
ANAPC4
ANAPC7
SH3D19
PSMD14
IFIH1
FYCO1
WDR45B
TBL1Y
WDR78
WDR70
WDR75
WDR74
WDR77
WDR76
PRPF8
PRPF4
RFFL
ZBTB10
ZBTB16
TRIM9
TRIM3
TRIM2
ANKRD13D
ANKRD13B
NUP62
USP17L5
FBXW9
FBXW2
FBXW4
FBXW5
FBXW7
SH3RF2
SH3RF3
SH3RF1
SH3PXD2B
SH3PXD2A
KLHL11
KLHL12
FYN
KLHL18
PAF1
NLE1
TRIM69
TRIM60
PAM
CUL9
CUL5
CUL7
CUL1
CUL2
CUL3
TRIM28
TRIM24
TRIM25
TRIM26
TRIM27
TRIM21
TRIM23
NSMAF
ARHGAP4
SPRTN
BAG1
BAG6
RNFT1
G2E3
RFPL4A
WDR5B
UBR5
TDRD3
SOCS6
MYLIP
WDR55
WDR53
WDR52
WDR59
GRB2
NEURL1B
USP53
USP51
PDZRN4
NUP43
TAB2
SUMO1
SUMO4
KIAA0317
PPWD1
ANKIB1
MIB1
UBE4B
UBE4A
TTC3
SENP8
SENP7
SENP5
SENP3
SENP2
SENP1
ING4
ING5
ING3
WDFY4
WDFY3
WDFY2
WDFY1
MED16
WDR85
TBCB
WDR83
WRNIP1
WDR34
RNF126
BTRC
RNF121
UBXN10
UBXN11
UBLCP1
FCHSD1
FCHSD2
TRAIP
UBA52
STXBP5
OSTM1
DAW1
SKP1
FANCL
DMXL2
DMXL1
FAM188B
PRKCI
MUL1
WWP2
WWP1
PPIL2
ZNF645
SORBS2
USP17L22
UBA6
UBA7
UBA5
UBA2
UBA3
UBA1
PWP2
PWP1
UBE2H
UBE2K
UBE2M
UBE2O
UBE2N
UBE2C
UBE2F
UBE2Z
UBE2S
UBE2T
UBE2W
TBL1XR1
NBR1
DTX1
DTX2
DTX3
BIRC6
BIRC3
CORO6
WDR63
WDR61
NHLRC1
PAFAH1B1
LYN
TRIML1
FBXL3
OTUD6B
OTUD6A
BRSK2
UBXN4
UBXN6
UBXN7
UBXN1
NACA
VAV1
VAV3
VAV2
TNFAIP1
TNFAIP3
DTX3L
SDCBP
DCAF8L1
DCAF8L2
SYVN1
WDR92
USP13
USP11
USP16
USP14
USP15
USP19
UBAC2
UBAC1
RHBDD3
FBXW10
FBXW11
USP17L7
USP17L4
WDR18
REN
TRIM72
TRIM71
IVNS1ABP
BMI1
STRAP
C1orf86
UBL4A
CYLD
SF3A1
UBL4B
ZNF230
RNF113B
RNF113A
INTS12
NAE1
RANBP2
ARNT
KLHL42
UIMC1
C6orf106
IRF2BP1
DNAI2
IRF2BPL
TNIP2
USP39
TNIP1
USP30
USP31
USP32
USP33
USP34
USP37
UBAP2L
SEC13
ESR1
FBXO2
FBXO3
FBXO4
HACE1
FANCD2
CORO1B
CORO1C
CORO1A
RING1
MID2
MID1
TRAF7
FAU
SNRNP40
HECTD2
HECTD3
HECTD4
TRIM8
UBD
UBB
UBC
WDR27
KBTBD3
ZBTB5
KBTBD8
RNF220
RNF222
PAK1IP1
USP17L19
HECW1
NOSIP
RFWD2
RFWD3
UFC1
MNAT1
ZC3H12A
SHKBP1
GEMIN5
LRR1
XIAP
KCMF1
RNF25
UBE2V2
RNF20
TOM1
CNOT4
GNB1L
DCAF4L2
TNIP3
FGR
USP35
USP36
C14orf164
AHI1
RRP9
DNMBP
UFM1
GABARAPL1
GABARAPL2
HCK
EML2
EML3
EML1
EML6
EML4
EML5
2026-03-02
CIAO1
HERC1
HERC3
HERC2
HERC5
HERC4
HERC6
REV1
TOM1L2
ASB14
TLE2
MYCBP2
TRIM6
FBXO9
USP17L20
PML
NUB1
MLST8
SEC31A
LAPTM5
KDM2A
GRAP2
GRAPL
CRBN
CDC40
CHAF1B
BIN1
CDCA3
PPP2R2D
PPP2R2B
THOC3
THOC6
TRIM6-TRIM34
MSL2
COPS6
COPS5
VEZF1
FBXL20
TRIO
ENC1
TCEB3
TCEB2
TCEB1
ATXN3L
HECTD1
WSB2
ZFP91
RICTOR
PJA1
PJA2
NSMCE1
UBE3C
ANAPC1
FBXO45
FBXO40
FBXO42
WDR1
RMND5A
PEX10
PEX12
DENND3
UBR2
UBR1
UBR4
SOCS7
SOCS1
SOCS2
PPP2CA
PACSIN1
CCNF
RNF40
DCUN1D1
DCUN1D2
DCUN1D3
DCUN1D5
AMPH
RNF123
KBTBD12
SACS
UBE2R2
PDZRN3
PIAS2
PIAS3
PIAS1
PIAS4
SAE1
KBTBD7
KBTBD4
KBTBD2
SHARPIN
OTUD7A
FBXO18
DLG4
GRWD1
FBXO11
FBXO17
ARHGAP10
UBE2D4
PARD6G
SPSB4
GTF2H2C
GTF2H2D
TRPC4AP
HECW2
TRIP12
IFT172
2026-03-05
2026-03-04
2026-03-07
2026-03-06
2026-03-01
2026-03-03
2026-03-09
EIF3I
EIF3F
NOL10
BARD1
UBTD2
UBTD1
PARP11
FXN
DNAJB2
DIDO1
TBL1X
RNF149
RNF141
RNF146
ARPC1B
RNF19A
PACSIN3
PACSIN2
COPA
WDR72
RWDD3
TRIM10
KBTBD6
AHCTF1
RCBTB1
ZBTB6
ASB3
ASB7
ASB4
ATG12
CCRL2
UPF1
VCPIP1
ZBTB9
RCHY1
SQSTM1
TMF1
NXF1
FAF1
FAF2
SART1
CDC27
CDC26
CDC23
NUP153
MYNN
KIAA1804
VPS36
KCTD3
KCTD2
KCTD7
KCTD5
KCTD9
ZC3HC1
FBXO44
FAM63A
BRAP
RNF167
RNF165
RNF168
ZBTB40
ZBTB42
ZBTB43
ZBTB44
ZBTB46
ZBTB47
ZBTB48
NTNG2
TRAF3IP2
WDTC1
BLK
POLH
ATXN3
KLHL6
NEDD8
NEDD1
NEDD4
ABTB2
KLHL3
UBXN8
TRIM5
TRIM4
ANKRD13A
UBE2V1
DCAF13
DDX58
BUB3
UBE2E1
UBE2E3
UBE2E2
FBXW8
DTL
FBXO22
FBXO27
FBXO25
FBXO28
GNB5
GNB4
AMBRA1
GNB3
GNB2
TRIM31
MAP1LC3B2
NOD2
HCLS1
VPS18
CSTF1
BPTF
AUP1
RNF185
RNF187
RNF181
ZNF131
AMFR
RBX1
ZBTB20
ZBTB21
ZBTB24
NEDD4L
PHF8
PHF2
PHF1
WHSC1L1
STRN4
STRN3
RIMBP3
UCHL1
UCHL3
ZNRF2
PREB
STAC2
RNF44
ANAPC10
ANAPC13
KAT6A
RNF41
NCF2
NCF1
NCF4
USP38
STAMBP
DCAF12
DCAF11
DCAF17
DCAF15
UBE2G1
KCTD21
NEDD8-MDP1
WDSUB1
WDR7
WDR6
WDR5
WDR4
RPS27A
ASB12
PDLIM2
TNK2
KDM2B
KLHL26
KLHL21
KLHL20
KLHL22
KLHL29
KLHL28
TRIM59
TRIM58
TRIM56
POLK
POLI
WDR60
RPTOR
EPS15
SETMAR
HGS
PPP1R13B
HUWE1
TEP1
FBXL14
PIK3R4
ARMC4
SHPRH
PAAF1
DMWD
RNF111
CBX4
PSEN2
PSEN1
WDR26
WDR24
WDR25
WDR20
LYST
ERCC6
UBE2I
SSR3
USP42
NSFL1C
TRIM74
POC1B
TRIM73
COPB2
PSTPIP1
ADRM1
RABGEF1
GAN
SPOPL
ITSN1
ITSN2
NBEA
AP1G2
ABL1
ABL2
GRAP
SNX9
FAM63B
USPL1
RNF166
ZBTB45
PPP2R2A
PPP2R2C
TSG101
GTF3C2
GTF3C1
SOLH
EPS15L1
RAG1
BOP1
MIOS
NFX1
TRIM11
TRIM15
TRIM16
NOSTRIN
RCBTB2
ASB2
ASB1
ASB6
TRIM22
ASB8
ASB9
SAG
ATG5
FNBP1L
TBL2
TBL3
TAF5L
MED8
ZBTB49
ABTB1
BTK
UTP15
UTP18
ARHGEF37
YOD1
OTUB1
OTUB2
TRIM54
KATNB1
DCAF7
DCAF6
DCAF5
DCAF4
DCAF8
JOSD1
TRIM51
TOPORS
EP300
WDR62
WDR66
WDR67
WDR64
USP50
KAT2B
USP49
USP48
USP45
USP44
USP47
USP46
USP41
USP40
USP43
RBCK1
USP8
BAP1
USP17L1P
ATG3
ATG7
MPND
FBXO32
RNF24
RBP1
RBP2
ARPC1A
TRIM39
TRIM38
TRIM33
TRIM32
NEBL
NEDD9
KLHL40
APAF1
TRIM37
TRIM36
TRIM35
TRIM34
COMMD3-BMI1
BRWD1
PRPF19
TRAF2
TRAF3
TRAF4
TRAF5
WDR41
WDR43
WDR44
WDR45
WDR47
WDR48
WDR49
CDC20
HOXB4
PPARG
WDR54
PPARA
RIMBP2
MKRN1
DDB1
KIF21A
KIF21B
USP54
CTTN
PLCG2
PLCG1
KLHL41
BZRAP1
PHF21A
NUP37
MAP3K10
DYNC1I1
IKBKG
BAZ1B
ZBTB8A
ZBTB8B
CREBBP
INPPL1
FEM1B
FEM1C
MLL
CDRT1
MAP3K9
MAP3K2
MAP3K3
MAP3K1
MAP3K5
SMARCAD1
DZIP3
RAD18
FAN1
BTBD19
BTBD18
ZMIZ2
ZMIZ1
URM1
PAN2
USP17L13
USP17L11
FBXL4
FBXL8
SH3D21
FBXL7
FBXL6
TRAF6
UBE3B
UBE3A
IPP
UBE3D
ZBTB41
MTF2
TAB3
UFL1
OTUD7B
SUMO3
SUMO2
STAMBPL1
AHR
KCTD11
USP17L12
UBXN2B
BTBD11
CBLL1
FBXO7
OTUD5
OTUD4
OTUD3
OTUD1
MAP2K5
WDR86
WDR87
WDR81
WDR82
WDR88
WDR89
USP17L18
E4F1
MAPKBP1
TNRC6C
USP29
USP28
USP26
USP25
USP24
USP22
USP21
USP20
ARHGEF6
ARHGEF7
CDH1
LDB2
MALT1
DHX36
WDHD1
MIB2
SATB2
SATB1
UHRF1
UHRF2
KEAP1
PHF14
PHF17
PHF10
CCNB1IP1
ZBTB3
ZBTB2
ZBTB1
ZBTB4
GNB1
CUL4A
CUL4B
ASB15
PATZ1
RNF217
RNF216
LZTR1
RNF213
RNF212
WDR16
SENP6
TOM1L1
EPN1
EPN2
UBXN2A
SH3GL1
SH3GL3
SH3GL2
GNB2L1
ING1
ING2
YES1
STAM2
SPOP
TP53BP2
STUB1
OSTF1
KLHL7
KLHL4
KLHL5
KLHL2
RAE1
KLHL1
KLHL8
KLHL9
NWD1
KDM5A
RNF32
CORO7-PAM16
PHIP
KLHL36
CISH
DDB2
RNF144B
RNF144A
EED
UBASH3A
UBASH3B
UBQLN2
UBQLN3
UBQLN1
UBQLN4
KLHL32
KLHL33
KLHL30
UBL5
UBL7
UBL3
KCTD6
GABARAP
WIPI2
ZNRF4
ZNRF1
ZNRF3
CBL
UBE2J2
HIC1
HIC2
NBEAL1
NBEAL2
PSMD4
PSMD7
HERPUD1
NAF1
NCK1
NCK2
SPTAN1
RBBP5
IBTK
BCAR1
ZBTB25
HDAC4
HDAC6
SKAP1
WDR31
JOSD2
CDC20B
USP1
USP2
USP3
USP4
USP5
USP6
USP7
RNF39
RNF34
RNF31
EPN3
STXBP5L
MPP7
ZFP106
ZFAND2B
CORO2B
CORO2A
USP17L17
USP17L15
STRN
USP17L10
LCK
POC1A
MAP3K11
SCAP
SEC31B
BAZ1A
SH3YL1
RSPRY1
CD2AP
KDM5D
KDM5B
KDM5C
UBE2L6
UBE2L3
IFT122
BTBD9
BTBD7
BTBD1
BTBD3
BTBD2
RAD23B
RAD23A
PLAA
BCL6B

## Sheet: Supplementary Table S3
Supplementary Table S3. List of Basic Information of Clinical Samples
Sample ID	Age (years)	Sex	Diagnosis	Site of onset	Disease duration (months)	ALSFRS-R score	Disease progression rate (ΔFS/month)	Riluzole use (Yes/No)	Edaravone use (Yes/No)	History
ALS-01	61	Female	ALS	Bulbar	13	43	0.38	Yes	Yes	Hypertension
ALS-02	45	Male	ALS	Bulbar	25	38	0.4	Yes	Yes	None
ALS-03	52	Male	ALS	Spinal	12	45	0.25	Yes	Yes	None
ALS-04	58	Female	ALS	Spinal	25	33	0.6	Yes	Yes	None
ALS-05	46	Male	ALS	Spinal	19	42	0.32	Yes	Yes	None
Control-01	47	Male	Healthy control	NA	NA	NA	NA	NA	NA	NA
Control-02	53	Male	Healthy control	NA	NA	NA	NA	NA	NA	NA
Control-03	59	Female	Healthy control	NA	NA	NA	NA	NA	NA	NA
Control-04	62	Female	Healthy control	NA	NA	NA	NA	NA	NA	NA
Control-05	35	Male	Healthy control	NA	NA	NA	NA	NA	NA	NA
Abbreviations: ALS, amyotrophic lateral sclerosis; ALSFRS-R, Amyotrophic Lateral Sclerosis Functional Rating Scale–Revised; ΔFS, disease progression rate; NA, not applicable.

## Sheet: Supplementary Table S4
Supplementary Table S4. List of Candidate Genes
	logFC	P.Value	adj.P.Val	change	Functional Annotation
TAX1BP1	0.342372	4.54e-12	2.07e-09	UP	This gene encodes a HTLV-1 tax1 binding protein. The encoded protein interacts with TNFAIP3, and inhibits TNF-induced apoptosis by mediating the TNFAIP3 anti-apoptotic activity. Degradation of this protein by caspase-3-like family proteins is associated with apoptosis induced by TNF. This protein may also have a role in the inhibition of inflammatory signaling pathways. Alternatively spliced tran…
ZBTB17	0.130577	2.64e-09	3.22e-07	UP	This gene encodes a zinc finger protein involved in the regulation of c-myc. The symbol MIZ1 has also been associated with PIAS2 which is a different gene located on chromosome 18. [provided by RefSeq, Jul 2008]
ASB6	0.111008	6.18e-09	6.62e-07	UP	The protein encoded by this gene belongs to a family of ankyrin repeat proteins that, along with four other protein families, contain a C-terminal SOCS box motif. Growing evidence suggests that the SOCS box, similar to the F-box, acts as a bridge between specific substrate-binding domains and the more generic proteins that comprise a large family of E3 ubiquitin protein ligases. Alternatively spl…
VAV1	0.195488	1.68e-08	1.55e-06	UP	This gene is a member of the VAV gene family. The VAV proteins are guanine nucleotide exchange factors (GEFs) for Rho family GTPases that activate pathways leading to actin cytoskeletal rearrangements and transcriptional alterations. The encoded protein is important in hematopoiesis, playing a role in T-cell and B-cell development and activation. The encoded protein has been identified as the spe…
OSTM1	0.132233	3.37e-08	2.7e-06	UP	This gene encodes a protein that may be involved in the degradation of G proteins via the ubiquitin-dependent proteasome pathway. The encoded protein binds to members of subfamily A of the regulator of the G-protein signaling (RGS) family through an N-terminal leucine-rich region. This protein also has a central RING finger-like domain and E3 ubiquitin ligase activity. This protein is highly cons…
ATG3	0.188513	6.26e-08	4.56e-06	UP	This gene encodes a ubiquitin-like-conjugating enzyme and is a component of ubiquitination-like systems involved in autophagy, the process of degradation, turnover and recycling of cytoplasmic constituents in eukaryotic cells. This protein is known to play a role in regulation of autophagy during cell death. A pseudogene of this gene is located on chromosome 20. Alternative splicing results in mu…
KCTD2	0.12421	2.44e-07	1.36e-05	UP	Predicted to enable cullin family protein binding activity. Predicted to be involved in proteasome-mediated ubiquitin-dependent protein catabolic process. Predicted to be part of Cul3-RING ubiquitin ligase complex. Predicted to be active in cytoplasm. [provided by Alliance of Genome Resources, Jul 2025]
LLGL1	-0.110741	7.01e-07	3.22e-05	DOWN	This gene encodes a protein that is similar to a tumor suppressor in Drosophila. The protein is part of a cytoskeletal network and is associated with nonmuscle myosin II heavy chain and a kinase that specifically phosphorylates this protein at serine residues. The gene is located within the Smith-Magenis syndrome region on chromosome 17. [provided by RefSeq, Jul 2008]
TRIM27	0.101839	8.8e-07	3.9e-05	UP	This gene encodes a member of the tripartite motif (TRIM) family. The TRIM motif includes three zinc-binding domains, a RING, a B-box type 1 and a B-box type 2, and a coiled-coil region. This protein localizes to the nuclear matrix. It interacts with the enhancer of polycomb protein and represses gene transcription. It is also thought to be involved in the differentiation of male germ cells. Fusi…
STUB1	0.156577	1.23e-06	5.15e-05	UP	This gene encodes a protein containing tetratricopeptide repeat and a U-box that functions as a ubiquitin ligase/cochaperone. The encoded protein binds to and ubiquitinates shock cognate 71 kDa protein (Hspa8) and DNA polymerase beta (Polb), among other targets. Mutations in this gene cause spinocerebellar ataxia, autosomal recessive 16. Alternative splicing results in multiple transcript variant…
MAP1LC3A	0.226241	2.72e-06	9.96e-05	UP	MAP1A and MAP1B are microtubule-associated proteins which mediate the physical interactions between microtubules and components of the cytoskeleton. MAP1A and MAP1B each consist of a heavy chain subunit and multiple light chain subunits. The protein encoded by this gene is one of the light chain subunits and can associate with either MAP1A or MAP1B. Two transcript variants encoding different isof…
RNF7	0.137051	2.84e-06	0.000102543	UP	The protein encoded by this gene is a highly conserved ring finger protein. It is an essential subunit of SKP1-cullin/CDC53-F box protein ubiquitin ligases, which are a part of the protein degradation machinery important for cell cycle progression and signal transduction. This protein interacts with, and is a substrate of, casein kinase II (CSNK2A1/CKII). The phosphorylation of this protein by CS…
ZFP91	-0.102582	3.91e-06	0.00013236	DOWN	The protein encoded by this gene is a member of the zinc finger family of proteins. The gene product contains C2H2-type domains, which are the classical zinc finger domains found in numerous nucleic acid-binding proteins. This protein functions as a regulator of the non-canonical NF-kappaB pathway in lymphotoxin-beta receptor signaling. Alternative splicing results in multiple transcript variants…
TRIM4	-0.152305	4.39e-06	0.000143846	DOWN	The protein encoded by this gene is a member of the tripartite motif (TRIM) family. The TRIM motif includes three zinc-binding domains, a RING, a B-box type 1 and a B-box type 2, and a coiled-coil region. The protein localizes to cytoplasmic bodies. Its function has not been identified. Alternatively spliced transcript variants that encode different isoforms have been described.[provided by RefSe…
TBCB	0.123592	5.68e-06	0.000179855	UP	Predicted to enable microtubule plus-end binding activity. Predicted to be involved in cytoplasmic microtubule organization. Located in cytosol. [provided by Alliance of Genome Resources, Jul 2025]
BAZ1A	0.224224	5.92e-06	0.000185557	UP	The BAZ1A gene encodes the accessory subunit of the ATP-dependent chromatin assembly factor (ACF), a member of the ISWI ('imitation switch') family of chromatin remodeling complexes (summarized by Racki et al., 2009 [PubMed 20033039]).[supplied by OMIM, Apr 2010]
RNF144B	0.145253	8.69e-06	0.000259094	UP	Enables ubiquitin-protein transferase activity. Involved in negative regulation of apoptotic process and ubiquitin-dependent protein catabolic process. Located in mitochondrial membrane. [provided by Alliance of Genome Resources, Jul 2025]
PRPF19	-0.110064	1.19e-05	0.000335267	DOWN	Enables identical protein binding activity and ubiquitin-ubiquitin ligase activity. Involved in several processes, including DNA damage checkpoint signaling; mRNA splicing, via spliceosome; and protein K63-linked ubiquitination. Acts upstream of or within protein polyubiquitination. Located in cytoplasm; nuclear lumen; and site of double-strand break. Part of Prp19 complex and U2-type catalytic s…
SPTAN1	-0.150227	1.94e-05	0.000500283	DOWN	Spectrins are a family of filamentous cytoskeletal proteins that function as essential scaffold proteins that stabilize the plasma membrane and organize intracellular organelles. Spectrins are composed of alpha and beta dimers that associate to form tetramers linked in a head-to-head arrangement. This gene encodes an alpha spectrin that is specifically expressed in nonerythrocytic cells. The enco…
SKAP2	0.221198	2.11e-05	0.000530472	UP	The protein encoded by this gene shares homology with Src kinase-associated phosphoprotein 1, and is a substrate of Src family kinases. It is an adaptor protein that is thought to play an essential role in the Src signaling pathway, and in regulating proper activation of the immune system. This protein contains an amino terminal coiled-coil domain for self-dimerization, a plecskstrin homology (PH…
NPLOC4	0.102544	2.18e-05	0.000546804	UP	Predicted to enable ubiquitin binding activity and ubiquitin protein ligase binding activity. Predicted to contribute to K48-linked polyubiquitin modification-dependent protein binding activity and K63-linked polyubiquitin modification-dependent protein binding activity. Involved in negative regulation of RIG-I signaling pathway; negative regulation of type I interferon production; and proteolysi…
RBCK1	0.140566	2.82e-05	0.000665266	UP	Enables several functions, including identical protein binding activity; transcription coactivator activity; and ubiquitin binding activity. Involved in several processes, including positive regulation of canonical NF-kappaB signal transduction; protein linear polyubiquitination; and regulation of DNA-binding transcription factor activity. Part of LUBAC complex. Implicated in glycogen storage dis…
UPF1	0.136342	8.02e-05	0.00151249	UP	This gene encodes a protein that is part of a post-splicing multiprotein complex involved in both mRNA nuclear export and mRNA surveillance. mRNA surveillance detects exported mRNAs with truncated open reading frames and initiates nonsense-mediated mRNA decay (NMD). When translation ends upstream from the last exon-exon junction, this triggers NMD to degrade mRNAs containing premature stop codons…
WDFY1	0.166302	0.000152289	0.0025747	UP	The protein encoded by this gene is a phosphatidylinositol 3-phosphate binding protein, which contains a FYVE zinc finger domain and multiple WD-40 repeat domains. When exogenously expressed, it localizes to early endosomes. Mutagenesis analysis demonstrates that this endosomal localization is mediated by the FYVE domain. [provided by RefSeq, Jan 2015]
PRPF8	-0.150502	0.000160241	0.00268984	DOWN	Pre-mRNA splicing occurs in 2 sequential transesterification steps. The protein encoded by this gene is a component of both U2- and U12-dependent spliceosomes, and found to be essential for the catalytic step II in pre-mRNA splicing process. It contains several WD repeats, which function in protein-protein interactions. This protein has a sequence similarity to yeast Prp8 protein. This gene is a …
UBR4	0.137291	0.000185431	0.00304422	UP	The protein encoded by this gene is an E3 ubiquitin-protein ligase that interacts with the retinoblastoma-associated protein in the nucleus and with calcium-bound calmodulin in the cytoplasm. The encoded protein appears to be a cytoskeletal component in the cytoplasm and part of the chromatin scaffold in the nucleus. In addition, this protein is a target of the human papillomavirus type 16 E7 onc…
FEM1C	0.1284	0.000207214	0.00331554	UP	Enables ubiquitin-like ligase-substrate adaptor activity. Involved in ubiquitin-dependent protein catabolic process via the C-end degron rule pathway. Located in cytosol and nucleoplasm. Part of Cul2-RING ubiquitin ligase complex. [provided by Alliance of Genome Resources, Jul 2025]
ABI3	-0.124104	0.000499155	0.00662934	DOWN	This gene encodes a member of an adaptor protein family. Members of this family encode proteins containing a homeobox homology domain, proline rich region and Src-homology 3 (SH3) domain, and are components of the Abi/WAVE complex which regulates actin polymerization. The encoded protein inhibits ectopic metastasis of tumor cells as well as cell migration. This may be accomplished through interac…
CRBN	0.148276	0.000760042	0.00917429	UP	This gene encodes a protein related to the Lon protease protein family. In rodents and other mammals this gene product is found in the cytoplasm localized with a calcium channel membrane protein, and is thought to play a role in brain development. Mutations in this gene are associated with autosomal recessive nonsyndromic cognitive disability. Multiple transcript variants encoding different isofo…
TBK1	0.103947	0.000852118	0.0100282	UP	The NF-kappa-B (NFKB) complex of proteins is inhibited by I-kappa-B (IKB) proteins, which inactivate NFKB by trapping it in the cytoplasm. Phosphorylation of serine residues on the IKB proteins by IKB kinases marks them for destruction via the ubiquitination pathway, thereby allowing activation and nuclear translocation of the NFKB complex. The protein encoded by this gene is similar to IKB kinas…
MAP3K11	0.148422	0.000927422	0.0107275	UP	The protein encoded by this gene is a member of the serine/threonine kinase family. This kinase contains a SH3 domain and a leucine zipper-basic motif. This kinase preferentially activates MAPK8/JNK kinase, and functions as a positive regulator of JNK signaling pathway. This kinase can directly phosphorylate, and activates IkappaB kinase alpha and beta, and is found to be involved in the transcri…
LAPTM5	0.105786	0.0011544	0.0126679	UP	This gene encodes a transmembrane receptor that is associated with lysosomes. The encoded protein, also known as E3 protein, may play a role in hematopoiesis. [provided by RefSeq, Feb 2009]
COPS5	0.101713	0.00119402	0.0130018	UP	The protein encoded by this gene is one of the eight subunits of COP9 signalosome, a highly conserved protein complex that functions as an important regulator in multiple signaling pathways. The structure and function of COP9 signalosome is similar to that of the 19S regulatory particle of 26S proteasome. COP9 signalosome has been shown to interact with SCF-type E3 ubiquitin ligases and act as a …
TRIM22	0.160696	0.00159194	0.0162694	UP	The protein encoded by this gene is a member of the tripartite motif (TRIM) family. The TRIM motif includes three zinc-binding domains, a RING, a B-box type 1 and a B-box type 2, and a coiled-coil region. This protein localizes to the cytoplasm and its expression is induced by interferon. The protein is involved in innate immunity against different DNA and RNA viruses. [provided by RefSeq, Oct 20…
MGRN1	0.155908	0.00198956	0.0192474	UP	Enables ubiquitin-protein transferase activity. Involved in endosome to lysosome transport; negative regulation of adenylate cyclase-activating G protein-coupled receptor signaling pathway; and protein monoubiquitination. Located in several cellular components, including early endosome; endoplasmic reticulum; and nucleus. [provided by Alliance of Genome Resources, Jul 2025]
CDC16	-0.104386	0.00229699	0.0214862	DOWN	The protein encoded by this gene functions as a protein ubiquitin ligase and is a component of the multiprotein APC complex. The APC complex is a cyclin degradation system that governs exit from mitosis by targeting cell cycle proteins for degredation by the 26S proteasome. Each component protein of the APC complex is highly conserved among eukaryotic organisms. This protein, and other APC comple…
PRKAA1	-0.102812	0.00239763	0.0222655	DOWN	The protein encoded by this gene belongs to the ser/thr protein kinase family. It is the catalytic subunit of the 5'-prime-AMP-activated protein kinase (AMPK). AMPK is a cellular energy sensor conserved in all eukaryotic cells. The kinase activity of AMPK is activated by the stimuli that increase the cellular AMP/ATP ratio. AMPK regulates the activities of a number of key metabolic enzymes throug…
ARHGAP26	0.101733	0.00257739	0.0235125	UP	Interaction of a cell with the extracellular matrix triggers integrin cell surface receptors to begin signaling cascades that regulate the organization of the actin-cytoskeleton. One of the proteins involved in these cascades is focal adhesion kinase. The protein encoded by this gene is a GTPase activating protein that binds to focal adhesion kinase and mediates the activity of the GTP binding pr…
BIRC2	0.112225	0.007012	0.0487734	UP	The protein encoded by this gene is a member of a family of proteins that inhibits apoptosis by binding to tumor necrosis factor receptor-associated factors TRAF1 and TRAF2, probably by interfering with activation of ICE-like proteases. This encoded protein inhibits apoptosis induced by serum deprivation and menadione, a potent inducer of free radicals. Alternatively spliced transcript variants e…
